# 1 Intracellular FUS protein accumulation 2 leads to cytoskeletal, organelle and cellular 3 homeostasis perturbations

4  
5 Chyi Wei Chung<sup>a</sup>, Alexandra J. Zhou<sup>b,c</sup>, Ioanna Mela<sup>a</sup>, Amberley D. Stephens<sup>a</sup>, Akinori Miyashita<sup>d,1</sup>, Peter  
6 H. St George-Hyslop<sup>d,e,f</sup>, Clemens F. Kaminski<sup>a</sup>, Tuomas P. J. Knowles<sup>b,c</sup>, Gabriele S. Kaminski Schierle<sup>a\*</sup>

7  
8 <sup>a</sup> Department of Chemical Engineering and Biotechnology, University of Cambridge, CB3 0AS, United Kingdom.

9 <sup>b</sup> Centre for Misfolding Diseases, Yusuf Hamied Department of Chemistry, University of Cambridge, CB2 1EW, United Kingdom.

10 <sup>c</sup> Cavendish Laboratory, Department of Physics, University of Cambridge, CB3 0HE, United Kingdom.

11 <sup>d</sup> Department of Medicine (Neurology), Temerty Faculty of Medicine, University of Toronto, and University Health Network,  
12 60 Leonard Avenue, Toronto, ON M5T 0S8, Canada.

13 <sup>e</sup> Cambridge Institute for Medical Research and Department of Clinical Neurosciences, School of Clinical Medicine,  
14 Addenbrookes Biomedical Campus, University of Cambridge, CB2 0XY, United Kingdom.

15 <sup>f</sup> Taub Institute for Research on Alzheimer's Disease and the Aging Brain, Department of Neurology, Columbia University Irvine  
16 Medical Center, 630 West 168<sup>th</sup> Street, New York, NY, USA 10032.

17 <sup>1</sup> Present address: Department of Molecular Genetics, Brain Research Institute, Niigata University, Niigata, Japan.

18  
19 \*Corresponding author: [gsk20@cam.ac.uk](mailto:gsk20@cam.ac.uk)

20

## 21 Summary

22 The molecular mechanisms that connect the formation of aberrant cytoplasmic FUS condensates to  
23 biological malfunction are incompletely understood. Here, we develop an approach to determine the  
24 intracellular FUS viscosity in live mammalian cells and find that ALS-related mutant P525L-FUS forms  
25 the most viscous condensates and has impaired cytoskeletal mechanoproperties and increased  
26 euchromatin formation. We further show that some of the main cellular organelles, e.g., actin/tubulin,  
27 lysosomes, mitochondria, the endoplasmic reticulum, are significantly functionally/structurally  
28 impaired in the presence of FUS. These may be related to defects in the tubulin network, as the latter  
29 facilitates transport, formation, fusion and fission of organelles. We observe significant increases in  
30 lysosomal biogenesis, size and pH; moreover, intracellular FUS accumulation significantly promotes  
31 cytoplasmic-to-nuclear translocation of TFEB, i.e., the master gene for inducing autophagy. However,  
32 despite these, increased autophagy needed for protein aggregate clearance is not observed to occur.  
33 Our study reveals that the formation of highly viscous FUS condensates significantly impacts  
34 cytoskeletal/organelle function and cellular homeostasis, which are closely associated with cell ageing.  
35 This raises the intriguing question as to whether mutant FUS activates similar cell processes as those  
36 during cellular senescence.

37 Keywords: fused-in sarcoma, amyotrophic lateral sclerosis, frontotemporal dementia, lysosomal de-  
38 acidification, TFEB, cytoskeletal defects, organelle dysfunction, autophagy-lysosomal pathway.

## 39 Introduction

40 The aberrant condensation of fused-in sarcoma (FUS) is a hallmark of both amyotrophic lateral sclerosis  
41 (ALS) and frontotemporal dementia (FTD). Under physiological conditions, FUS undergoes liquid-liquid  
42 phase separation (LLPS) and exists in a liquid and/or a dense condensate state predominantly within  
43 cell nuclei. Prominent cytoplasmic mislocalisation and the formation of more viscous, and in many  
44 cases, gelled condensates or even fibrillar aggregates, are observed upon missense and truncation  
45 mutations. Many, but not all of these ALS-associated mutations occur within the FUS nuclear  
46 localisation signal (NLS) (Bosco et al., 2010; Conte et al., 2012; Waibel et al., 2010). Pathological phase  
47 separation and the formation of gelled condensates have also been linked to arginine hypomethylation  
48 of FUS, as commonly observed in cases of sporadic FTD, which leads to disruptions in cytoplasmic  
49 ribonucleoprotein (RNP) granule function (e.g., stress granules (SGs) and neuronal transport granules)  
50 (Hofweber et al., 2018; Murakami et al., 2015; Qamar et al., 2018).

51 Whilst much attention has been given to the pathological role of FUS in the formation of  
52 cytoplasmic SGs, an understanding of how FUS condensation leads to disturbances in cellular  
53 homeostasis and function would be invaluable. This knowledge could also yield avenues for therapeutic  
54 intervention in diseases associated with the aberrant assembly of these proteins, such as FUS-  
55 associated ALS (fALS-FUS) and frontotemporal lobar degeneration (FTLD-FUS).

56 A potentially powerful clue to the latter may come from a detailed analysis of different fALS-  
57 FUS and FTLD-FUS models. We thus first established different FUS expressing cell lines and stress  
58 models in HEK293T cells before comparing the changes in intracellular FUS viscosity of the various FUS  
59 models. Combining single particle tracking (SPT-) and fluorescence lifetime imaging microscopy (FLIM),  
60 we develop a method to quantify intracellular FUS viscosity without the need for an external  
61 sensor/tracer, and that is higher-throughput than conventional fluorescence recovery after  
62 photobleaching (FRAP). To understand how FUS condensation leads to disturbances in cellular  
63 homeostasis, we then focused our analysis on the role of FUS in the nucleus and the cytoplasm,

64 including its effect on the cytoskeleton and on organelle positioning and function. We show that P525L-  
65 FUS cells form the most viscous condensates, which affect the level of euchromatin formation,  
66 cytoskeletal proteins and organelle positioning and function, including lysosomes, mitochondria and  
67 the endoplasmic reticulum (ER). We show that the latter is linked to the observed lysosomal de-  
68 acidification, which acts as a trigger for the nuclear to cytoplasmic translocation of transcription factor  
69 EB (TFEB), i.e., the master modulator of autophagic genes. Instead of the expected upregulation of  
70 macroautophagy (henceforth referred to as autophagy), however, autophagy is blocked at an early  
71 stage, which promotes cellular malfunction and disease progression (Aman et al., 2021; Martini-Stoica  
72 et al., 2016).

73

74

## 75 Results

76 Fluorescence lifetime imaging and single particle tracking form a tool to measure FUS  
77 condensate viscosity in live cells

78 Studying phase separation in live cells, and thus characterising intracellular FUS viscosity is challenging  
79 (Kuimova, 2012). We have previously shown, however, that protein phase separation and aggregation  
80 can be measured *in vitro* and in live cells using FLIM (Chen et al., 2017; Esbjörner et al., 2014). We thus  
81 first investigated whether SPT, which permits exact viscosity measurements *in vitro*, can be correlated  
82 with FLIM. We generated LLPS condensates by mixing equal amounts of recombinant GFP- and  
83 unlabelled WT-FUS protein. We then added the protein mixture into a solution containing 10%  
84 polyethylene glycol 35 (PEG-35) and 150 mM potassium chloride (KCl) to mimic the molecular crowding  
85 and ionic environments of the nuclear and cytoplasmic intracellular compartments. As we were  
86 interested in aggregation kinetics and changes in the micro-rheology of FUS with time, we performed  
87 ageing experiments involving SPT and FLIM over time, giving us a means to quantify both parameters  
88 of interest (**Figure 1A**). To probe the viscosity within FUS condensates, we introduced 40 nm fluorescent  
89 nanoparticles into the condensate mixture and tracked their trajectories. Because fluctuations seen in  
90 tracked nanoparticle trajectories are predominantly due to Brownian motion (Crocker and Grier, 1996);  
91 hence, we were able to calculate intra-condensate FUS viscosity from their mean square displacement  
92 (MSD) profiles. Between the 0 to 1h time points, FUS in the condensates becomes more viscous, with  
93 viscosity values increasing from  $0.11 \pm 0.01$  Pas to  $0.44 \pm 0.08$  Pas (**Figure 1B**, blue points). We observe a  
94 correlation between FLIM and SPT measurements (**Figure 1B**). During the same time period during  
95 which increased viscosity is observed, the GFP-tagged FUS molecules in the condensates cluster more  
96 closely, as indicated from the decrease in their fluorescence lifetimes from  $2.23 \pm 0.01$  ns to  $2.08 \pm 0.01$   
97 ns (**Figure 1B**, red points; **Figure 1C**, Condensates). These values are in turn lower than that of dispersed  
98 WT-FUS before LLPS at 2.53 ns (**Figure 1B**, green point; **Figure 1C**, dispersed), which has a viscosity of  
99 0.004 Pas from SPT measurements. To induce the fibrillation of FUS, we removed PEG-35 from the

100 condensate mixture described above to yield solid fibrils with a fluorescence lifetime in the range of  
101  $2.01 \pm 0.01$  ns (**Figure 1B**, magenta point; **Figure 1C**, Fibrils). As the fluorescence lifetime of GFP is  
102 independent of the viscosity of its surrounding environment (Davidson et al., 2020), we note that FLIM  
103 and SPT yield independent and complementary parameters indicative of the level of FUS compaction  
104 and viscosity, respectively. Our data further show that beyond an hour, there are no further significant  
105 changes in either fluorescence lifetime or viscosity.

106 To observe both physiological and aberrant condensate formation of FUS in a cell model, we  
107 created HEK293T cells expressing GFP-labelled FUS (**Figure S1A**). To ensure that our observations were  
108 not due to the accumulation of GFP, we included cells expressing a GFP only construct (i.e., Control) in  
109 our experiments. We studied WT-FUS, and two ALS-related mutants, (i.e., P525L and R495X with a point  
110 site mutation at and truncation of the NLS, respectively), thereby leading to cytoplasmic mislocalisation  
111 of FUS (Gonzalez et al., 2021). Pathological phase separation of FUS is also promoted upon  
112 hypomethylation of its arginine-rich domain, yielding irreversible FUS hydrogels that are prevalent in  
113 FUS-related forms of sporadic FTD (Hofweber et al., 2018; Murakami et al., 2015). In order to induce  
114 FUS hypomethylation, we treated the cells with adenosine periodate oxidase (AdOx), an arginine  
115 methyltransferase inhibitor, which modulates the methylation state of the RNA-binding, arginine-rich  
116 domain of FUS (Fujii et al., 2016; Qamar et al., 2018). This promotes gelation and results in the  
117 formation of clusters of hypomethylated (HYPO) intranuclear aggregates (**Figure S1B**). P525L-FUS cells  
118 lose cytoplasmic mislocalisation, whereas R495X-FUS cells (which have a truncated NLS) still retain  
119 cytoplasmic condensates after AdOx treatment. Furthermore, we induced the formation of SGs using  
120 sodium arsenite ( $\text{NaAsO}_2$ ) (**Figure S1C**). Existing as membraneless LLPS structures of cytoplasmic RNPs,  
121 SGs are transient structures of translationally stalled mRNA complexes and proteins (Sama et al., 2013).  
122 However, it has been suggested that in neurodegeneration models, they become persistent and are  
123 the site of aberrant aggregation (Wolozin and Ivanov, 2019). We validated the formation of SGs in our  
124 cell models by immunostaining of Ras-GTPase-activating protein binding protein (G3BP), a protein  
125 marker for the assembly and dynamics of SGs (**Figure S2**) (Yang et al., 2020). Agreeing with previous

126 reports (Baron et al., 2013; Bosco et al., 2010), we observe colocalisation of FUS and G3BP only in the  
127 case of mutant variants of FUS (**Figure S2B**), despite the formation of SGs in all cell models.

128

129 ALS-associated FUS mutants form the most viscous aggregates in live cells

130 Using FLIM, we could quantify the aggregation propensity and extent of FUS in our cell models (**Figure**  
131 **1D&E**). We observe that the NLS-mutants have more aggregated FUS (cell-averaged values of  $2.48 \pm 0.12$   
132 ns and  $2.49 \pm 0.12$  ns for P525L- and R495X-FUS, respectively), in comparison to nuclear-localised WT-  
133 FUS ( $2.62 \pm 0.07$  ns) with fluorescence lifetimes that do not differ significantly from control cells at  
134  $2.64 \pm 0.06$  ns. As FUS in SGs and hypomethylated intranuclear aggregates have higher fluorescence  
135 intensities than other compartments of the cell (**Figure S1B&C**), we could segment them by setting a  
136 fluorescence intensity threshold (**Figure 1D**, AdOx & NaAsO<sub>2</sub>). In comparison to R495X-, P525L-FUS has  
137 a lower fluorescence lifetime than hypomethylated intranuclear aggregates ( $1.78 \pm 0.05$  ns *cf.*  $2.01 \pm 0.04$   
138 ns in R495X) and SGs ( $2.35 \pm 0.06$  ns *cf.*  $2.46 \pm 0.02$  ns in R495X). To calculate the intracellular viscosity of  
139 FUS, we created a fluorescence lifetime to viscosity calibration based on the *in vitro* FUS condensate  
140 system (**Figure S3A**), noting that GFP fluorescence lifetimes of recombinant FUS and the HEK293T FUS  
141 models fall within the same range of 1.6—2.6 ns (**Figure 1E**). Hence, we perform linear fitting (**Figure**  
142 **S3A**, black line) on SPT-FLIM data of the *in vitro* protein condensate system (**Figure S3A**, grey circles),  
143 to map fluorescence lifetime values of FUS imaged in live HEK293T cells to their corresponding viscosity  
144 values (**Figure 1E**, secondary axis). We note that before both AdOx and NaAsO<sub>2</sub> treatment, the two NLS  
145 mutants of FUS are more viscous at  $\sim 0.10$  Pas than WT-FUS at 0.05 Pas. Moreover, we estimate that  
146 hypomethylated aggregates differ in their viscosity to SGs by a factor of 5—10, i.e.,  $0.69 \pm 0.05$  (AdOx –  
147 P525L) to  $0.14 \pm 0.06$  Pas (NaAsO<sub>2</sub> – P525L) and  $0.47 \pm 0.04$  (AdOx – R495X) to  $0.04 \pm 0.02$  Pas (NaAsO<sub>2</sub> –  
148 R495X).

149 We observe a similar trend upon calculating the diffusion coefficient of these FUS macro-  
150 assemblies inside cells (**Figure S3B**). For the latter, we extracted MSD profiles of the FUS macro-  
151 assemblies' trajectories over time, which we imaged in a similar manner to SPT measurements for the  
152 *in vitro* condensates. For both, AdOx and NaAsO<sub>2</sub> treatments, P525L-FUS cells yield HYPO nuclear  
153 aggregates and SGs of lowest mobility, with respective diffusion coefficients of  $0.036 \pm 0.004 \text{ nm}^2 \text{ s}^{-1}$   
154 (compared to  $0.044 \pm 0.004 \text{ nm}^2 \text{ s}^{-1}$  in WT-FUS cells) and  $0.011 \pm 0.002 \text{ nm}^2 \text{ s}^{-1}$  (compared to  $0.025 \pm 0.001$   
155  $\text{nm}^2 \text{ s}^{-1}$  in R495X-FUS cells). As aforementioned, R495X-FUS is the only model that retains the  
156 cytoplasmic distribution of FUS upon AdOx treatment due to its truncated NLS (**Figure S1B**). We observe  
157 that the hypomethylated aggregates it forms are the most mobile with a diffusion coefficient  
158  $0.076 \pm 0.007 \text{ nm}^2 \text{ s}^{-1}$  (i.e., two-fold that of P525L- and WT-FUS). Hence, using both, our fluorescence  
159 lifetime to viscosity calibration as well as diffusion coefficient measurements, we show that there are  
160 differences in the way different FUS variants interact with their nuclear and cytoplasmic environment,  
161 which affect their aggregation propensity.



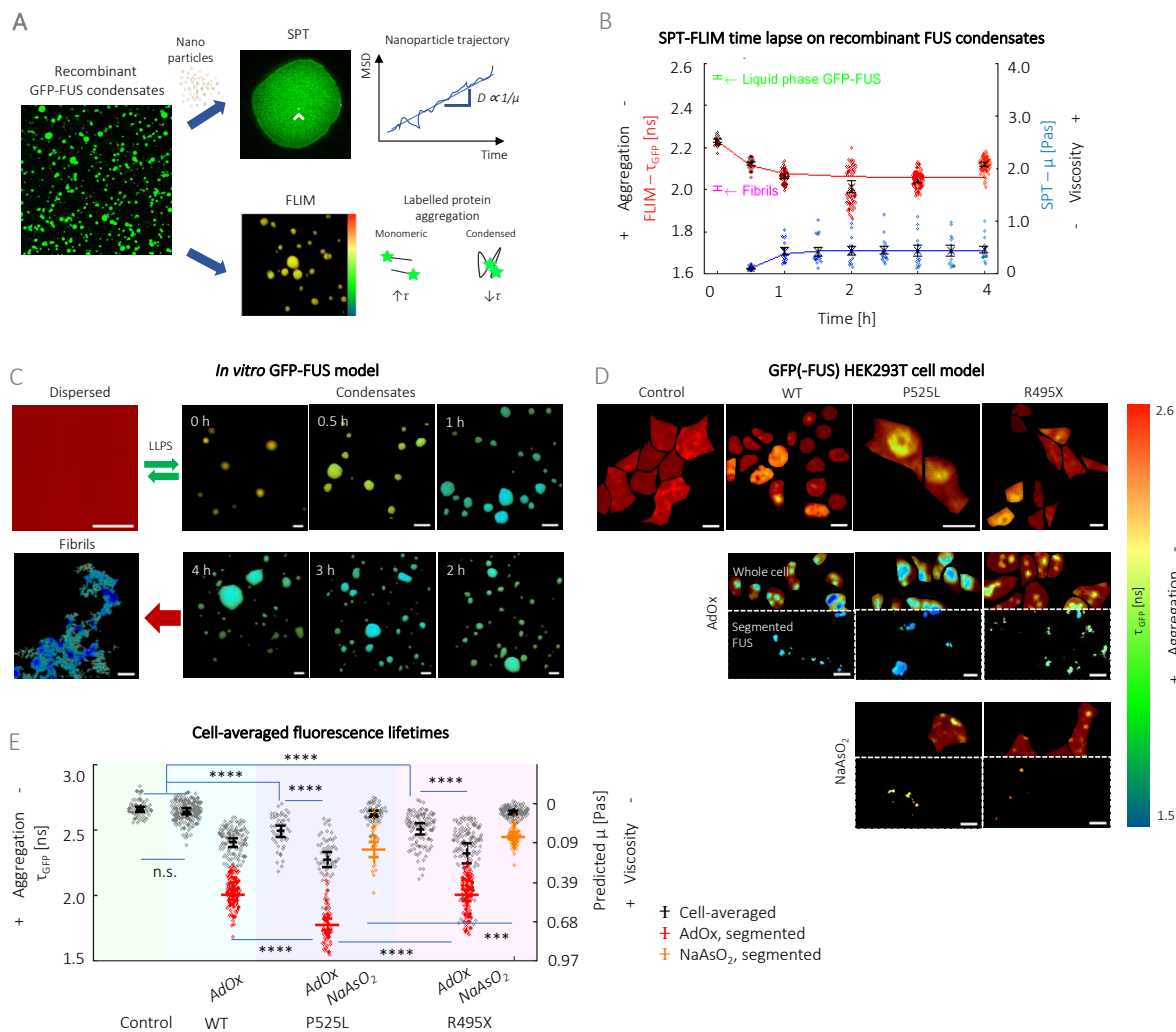

162

163 **Figure 1: Fluorescence lifetime to viscosity calibration reveals that ALS-associated P525L-FUS forms the most viscous**  
 164 **condensates.** (A) FLIM and SPT measurements were performed on *in vitro* FUS condensates, giving a measure of condensation  
 165 state and viscosity, respectively. For SPT, 40 nm nanoparticles (denoted by white arrowhead) were mixed into the condensates  
 166 and the mean square displacement (MSD) profiles of their trajectory were analysed. (B) Combined SPT-FLIM data show that  
 167 there is a trend between GFP fluorescence lifetimes ( $\tau_{GFP}$ , FLIM in red) and viscosity ( $\mu$ , SPT in blue), where more aged FUS  
 168 condensates are also more viscous. Values plateau  $\sim$ 1 hour and show no further change upon subsequent ageing. (C)  
 169 Fluorescence lifetime maps for liquid-to-solid transition of recombinant FUS. A decrease in  $\tau_{GFP}$  is used to quantify increasing  
 170 condensation as dispersed FUS undergoes LLPS to form condensates, which are aged over a 4-hour period. Upon irreversible  
 171 solid transition (i.e., formation of fibrils), fluorescence lifetime values are at the lowest values at  $2.01 \pm 0.01$  ns. Scale bars, 10  
 172  $\mu$ m. (D) Fluorescence lifetime maps for FUS in the GFP HEK293T model, which show that fluorescence lifetimes fall in the  
 173 same 1.5–2.6 ns range as the *in vitro* system in (C). The formation of hypomethylated (HYPO) intranuclear aggregates (first  
 174 row, AdOx) and SGs (second row, NaAsO<sub>2</sub>) were induced by the addition of different stressors. These macro-assemblies can

175 be easily segmented by fluorescence intensity thresholding (Segmented FUS). Scale bars, 10  $\mu\text{m}$ . (E) Cell averaged-  
176 fluorescence lifetimes values (black) alongside viscosity predicted from correlative FLIM-SPT calibration on in vitro  
177 condensates (B). ALS-related FUS mutant cells have lower  $\tau_{\text{GFP}}$  (i.e., are at a more condensed state) in comparison to WT-FUS  
178 and control cells. Fluorescence lifetimes of segmented hypomethylated nuclear aggregates (AdOx, red) and SGs (NaAsO<sub>2</sub>,  
179 orange) are also given, with P525L- forming more viscous macroassemblies compared to R495X-FUS. *In vitro* and HEK293T  
180 FUS cell measurements were based on 3 individual protein preparations and 3 biological repeats respectively. One-way ANOVA  
181 test (with Holm-Sidak's multiple comparison), where n.s. is not significant, \*\*\*  $p < 0.001$  and \*\*\*\*  $p < 0.0001$ .

182

183 P525L-FUS mutant impairs cellular mechanoproperties and enhances euchromatin  
184 formation

185 We have thus far established that there are differences in the condensation states of FUS, with mutant  
186 P525L- and R495X-FUS being in a more condensed state than WT-FUS, even if the latter has been  
187 exposed to stressors such as AdOx and NaAsO<sub>2</sub>. It has been suggested that loss of FUS functionality and  
188 its cytoplasmic mislocalisation can cause loss or gain of function defects by affecting essential  
189 cytoskeletal proteins (Theunissen et al., 2021). To further characterise the latter in our HEK293T cell  
190 models, we visualise filamentous (f-)actin and microtubules (i.e., the 2 main proteins of the  
191 cytoskeleton) using far-red fluorogenic Silicon Rhodamine (SiR) dyes (Lukinavičius et al., 2014) (**Figure**  
192 **2**). As the SiR-dyes are of high specificity and only become fluorescent upon binding, their fluorescence  
193 intensity can be used as to measure f-actin and microtubule polymerisation levels. Our data reveal that  
194 only P525L- and not R495X-FUS has a significant impact on the cytoskeleton, as shown by reduction of  
195 f-actin, as shown by a loss in SiR-Actin intensity. A similar effect on SiR-Actin intensity can only be  
196 induced by stressors, such as AdOx and NaAsO<sub>2</sub>, which cause hypomethylation or SG formation,  
197 respectively (**Figure 2A&B**). However, in the case of P525L-FUS, the above stressors do not cause a  
198 further defect on the cytoskeleton as P525L-FUS alone does. We next used SiR-Tubulin and performed  
199 similar experiments as described above to see whether FUS condensates would also affect the  
200 microtubule protein, tubulin. It is observed that P525L-FUS, followed by R495X-FUS, cells have the  
201 lowest SiR-Tubulin intensity levels prior to drug treatments. Interestingly though, AdOx treatment,

202 which promotes nuclear translocation of FUS and the formation of hypomethylated clusters, reduces  
 203 the burden on microtubules mainly present in the cytoplasmic region, the effect being strongest in  
 204 P525L-FUS cells, where the largest drop in SiR-Tubulin intensity has occurred prior to the addition of  
 205 AdOx (**Figure 2C&D**). The opposite effect is seen when cytoplasmic SGs are formed using NaAsO<sub>2</sub>, which  
 206 results in significantly reduced SiR-Tubulin intensities in all models. Additionally, we quantified the  
 207 amounts of f-actin and β-tubulin (a sub-unit of microtubules) in the cell samples based on a Western  
 208 Blot (**Figure S4**), and we find they do not differ significantly between FUS variants. Hence, this may  
 209 indicate that depolymerisation of actin and microtubules has occurred, instead of lower concentrations  
 210 of either being expressed.

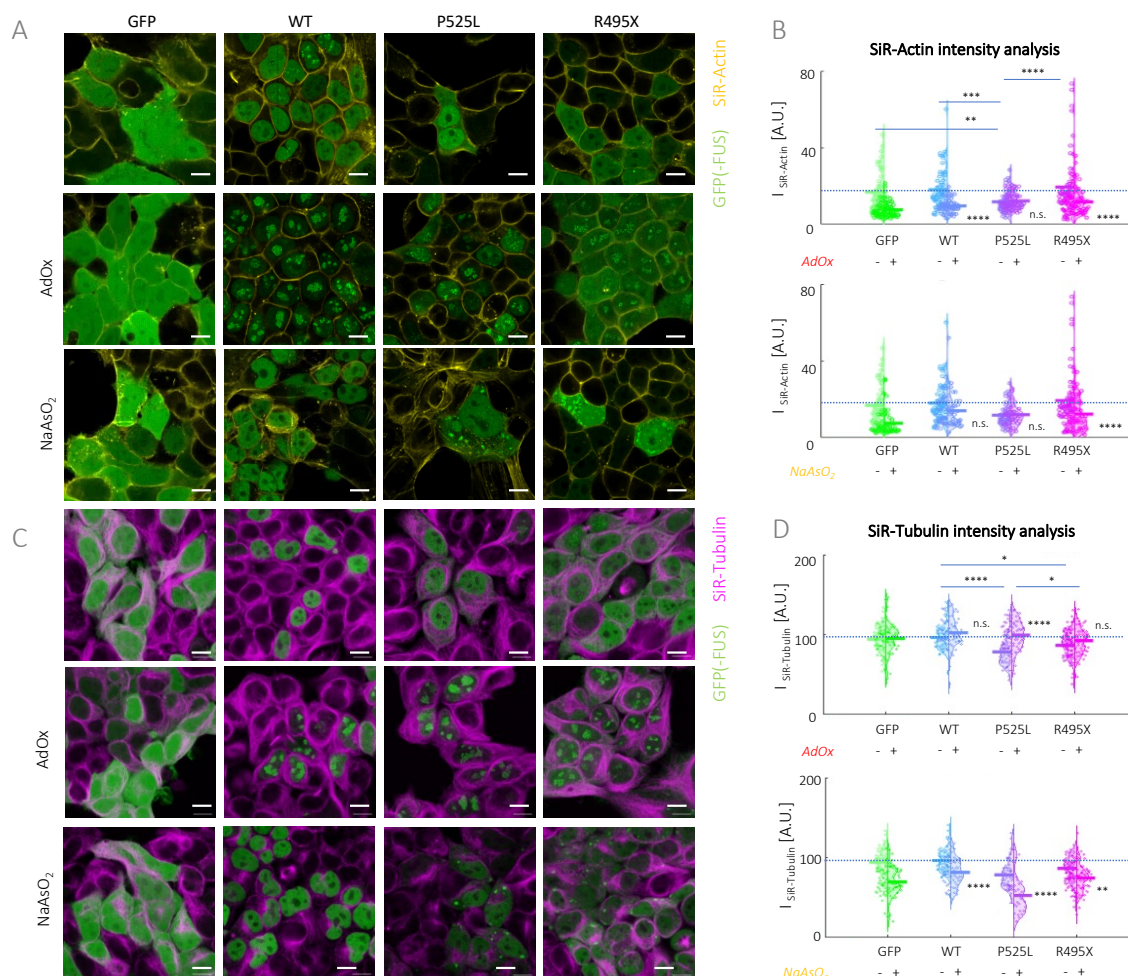

211

212 **Figure 2: ALS-associated P525L-FUS has lowered levels of important cytoskeletal proteins based on SiR-dye staining.** (A) Fluorescence  
 213 intensity composite images for GFP(-FUS) (green) and SiR-Actin (yellow). Scale bars, 10 μm. (B) Cell-averaged fluorescence intensity

214 quantification for SiR-Actin ( $I_{\text{SiR-Actin}}$ ). f-actin levels in P525L-FUS cells are low even without the addition of any stressors. AdOx has a greater  
215 effect in comparison to NaAsO<sub>2</sub> on reducing f-actin levels. (C) Fluorescence intensity composite images for GFP(-FUS) (green) and SiR-Tubulin  
216 (magenta). Scale bars, 10  $\mu\text{m}$ . (D) Cell-averaged fluorescence intensity quantification for SiR-Tubulin ( $I_{\text{SiR-Tubulin}}$ ). Tubulin levels in P525L- and  
217 R495X-FUS cells are impacted even without the addition of any stressors. The formation of HYPO aggregates improves microtubule levels, in  
218 contrast to SGs which impair microtubules. HEK293T measurements were based on 3 biological repeats. One-way ANOVA test (with Holm-  
219 Sidak's multiple comparison), where \* for  $p < 0.05$ , \*\*  $p < 0.01$ , \*\*\*  $p < 0.001$ , \*\*\*\*  $p < 0.0001$ .

220 To confirm that FUS condensates indeed affect cellular mechanoproperties by interfering with  
221 the two most important cytoskeletal proteins, actin and tubulin, we perform force-displacement (FD)-  
222 atomic force microscopy (AFM) measurements on the cytoplasmic regions of live cells (**Figure S5**). In  
223 comparison to WT-FUS cells, we have seen that mutant P525L-FUS cells display the lowest levels of  
224 polymerisation for both cytoskeletal proteins investigated; moreover, R495X-FUS cells have lower levels  
225 of SiR-Tubulin detected (**Figure 2**). Corroborating this, we find that P525L-FUS cells have the softest  
226 cytoplasm with an average apparent Young's modulus ( $E_{\text{App}}$ ) of  $12.3 \pm 2.2$  kPa, followed by R495X at  
227  $13.7 \pm 4.0$  kPa, in comparison to WT-FUS at  $25.5 \pm 2.2$  kPa (**Figure S5A**); these measurements correspond  
228 to intensity quantifications of SiR-dyes (**Figure 2**). Hence, we believe that the softening we observe is  
229 due to destabilisation of the cytoskeleton i.e., a decrease in  $E_{\text{App}}$  corresponds to lower intensities of the  
230 SiR-dyes (**Figure S5B**). It is interesting to note that the expression of a cytoplasmic protein, such as GFP  
231 in the control cells, also has an effect on the cell mechanoproperties as measured by FD-AFM. However,  
232 in contrast to FUS cells, which mainly leads to accumulation in the nucleus for WT-FUS and some  
233 cytoplasmic condensates in P525L- and R495X-FUS cells, no effect on the cytoskeletal proteins is  
234 observed in GFP control cells.

235 We have shown above that AdOx treatment has a significant effect on FUS condensate  
236 formation, but AdOx is also known as a drug that reduces DNA methylation. We therefore investigated  
237 the effect FUS condensates might have on the level of euchromatin formation, which is strongly  
238 increased by hypomethylation. We have recently shown that the dye SiR-DNA (or SiR-Hoechst) can be  
239 used to determine the level of eu/heterochromatin formation in live cells (Hockings et al., 2020; Novo  
240 et al., 2022). As SiR-DNA intercalates with DNA structures, its fluorescence lifetime is significantly

241 affected by the level of chromatin condensation. Since euchromatin formation is associated with  
242 significant DNA decondensation, an increase in the fluorescence lifetime of SiR-DNA can be associated  
243 with an increase in euchromatin formation (Hockings et al., 2020; Novo et al., 2022). We observe that  
244 both FUS mutant cells contain more euchromatin (i.e., more decondensed DNA), with P525L-FUS cells  
245 ( $3.44 \pm 0.03$  ns) experiencing a greater extent of DNA decondensation than R495X-FUS cells ( $3.43 \pm 0.04$   
246 ns) and in comparison to the GFP control ( $3.40 \pm 0.03$  ns) and WT-FUS cells ( $3.41 \pm 0.03$  ns) (**Figure 3C&D**).  
247 To further control our results, we applied two different drugs known to hinder DNA compaction, i.e.,  
248 AdOx (due its effect on DNA hypomethylation (Schwerk and Schulze-Osthoff, 2005)) and Trichostatin A  
249 (TSA, which induces histone diacetylase (HDAC) inhibition (Moreira et al., 2003; Vigushin et al., 2001))  
250 to control cells, which also raised the fluorescence lifetime of SiR-DNA to  $3.44 \pm 0.04$  and  $3.43 \pm 0.03$  ns,  
251 respectively. It is interesting to note that the effect aberrant FUS condensates has on euchromatin  
252 formation is as severe as the one induced by drugs, such as AdOx and TSA. Taken together, cytoskeletal  
253 defects as well as changes in euchromatin state are most prevalent in mutant variants of FUS, especially  
254 P525L-FUS.

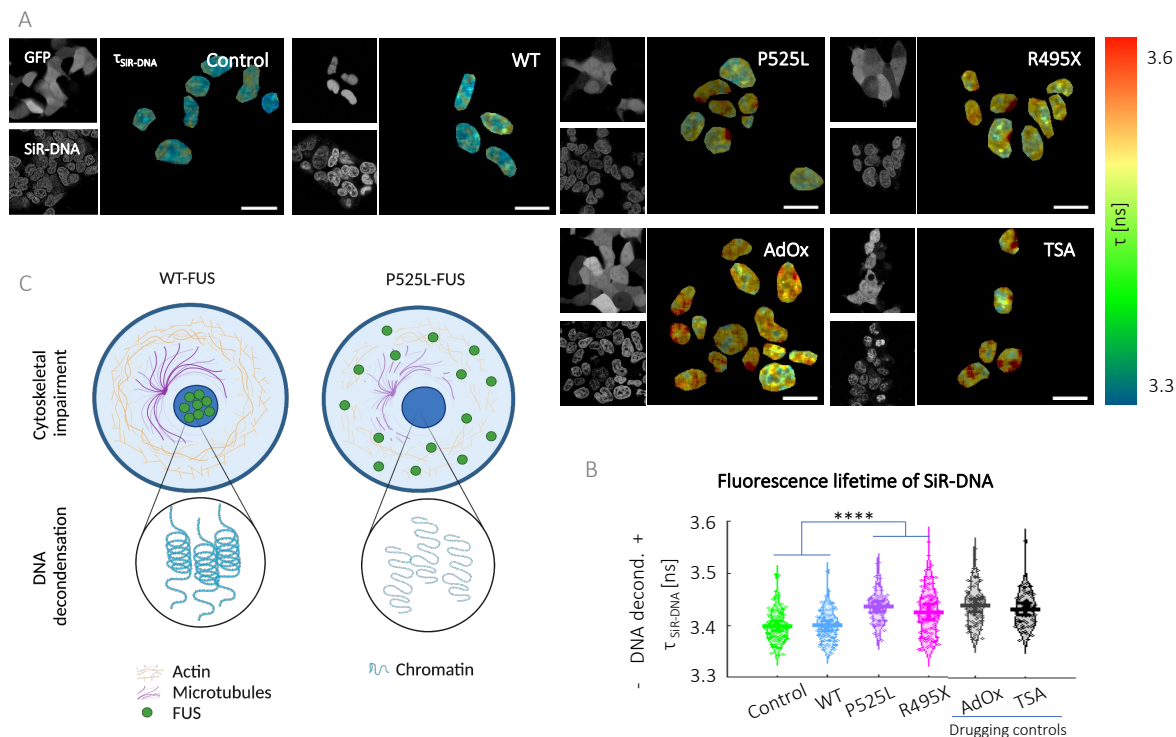

255

256 **Figure 3: ALS-related FUS mutants lead to an increase in euchromatin formation.** (A) Fluorescence lifetime of SiR-DNA is used  
 257 as a measure of DNA decondensation, which is related to heterochromatin formation. Mutant FUS cells exhibit lower level of  
 258 heterochromatin formation (i.e., higher  $\tau_{\text{SiR-DNA}}$ ). GFP control cells treated with AdOx and TSA which cause DNA  
 259 hypomethylation and HDAC inhibition, were included. (B) Fluorescence lifetime maps. Scale bars, 10  $\mu\text{m}$ . (C) Cartoon  
 260 illustration of impaired mechanoproperties of P525L-FUS cells due to weakened cytoskeleton and DNA damage in comparison  
 261 to WT-FUS cells. Created on Biorender.com. HEK293T measurements were based on 3 biological repeats. One-way ANOVA  
 262 test (with Holm-Sidak's multiple comparison), where \* for  $p < 0.05$ , \*\*  $p < 0.01$ , \*\*\*  $p < 0.001$ , \*\*\*\*  $p < 0.0001$ .

263

## 264 Aberrant FUS aggregation impacts normal organelle function

265 The above studies have shown that mutant FUS has a significant effect on the cytoskeleton, which, in  
 266 particular for tubulin. We thus investigated whether this effect on the microtubules might interfere  
 267 with organelles, such as lysosomes, mitochondria, and ER, as the microtubules are important for the  
 268 positioning, formation, fission, and fusion of the latter (Mattenberger et al., 2003; Pu et al., 2016). We  
 269 applied super-resolution 2-colour structured illumination microscopy (SIM) with a resolution of 100 nm  
 270 (i.e., below the diffraction limit) (Young et al., 2016) in COS7 cells, which have a flat morphology ideal



271 for SIM, as the technique is sensitive to out-of-focus glare associated with thicker samples (Ma et al.,  
272 2021). We show that clustering of lysosomes and mitochondria at the perinuclear area of cells is greater  
273 in P525L-, compared to WT-FUS and control cells (**Figure S6**). We have recently found that lysosomes  
274 are responsible for the maintenance of the tubular ER network in the periphery of cells (Lu et al., 2022,  
275 2020). Thus, clustering of lysosomes in the perinuclear area may significantly impair the tubular ER  
276 network in the cell periphery. Hence, to investigate if a collapse in the tubular ER structure also follows  
277 upon intracellular FUS accumulation, we co-expressed an ER marker, mEmerald-sec61 $\beta$  (Nixon-Abell et  
278 al., 2016) in mCherry (mChe) versions of our control and FUS cells. Synthetic, hypomethylation-  
279 mimicking variants which have increased numbers of arginine (i.e., 9R and 16R) were additionally  
280 included as further controls (Qamar et al., 2018). We observe that there is a significant impact on the  
281 tubular ER network as indicated by a decrease in the ER tubular to sheet ratio compared to the control  
282 upon FUS accumulation (**Figure S7A&B**). Furthermore, we also observe a decline in mitochondrial  
283 eccentricity (i.e., more rounded structures) in the presence of FUS accumulation, and particularly in  
284 P525L-FUS when compared to the control (**Figure S7D&E**), which may indicate defects in mitochondrial  
285 fission and increased mitochondrial stress.

286 Since lysosomes also play an important role not only the formation of the ER tubular network  
287 but also in protein homeostasis, we analysed their structure and function in the different FUS cells in  
288 more detail. To visualise the nanoscale structures of lysosomes in live cells, we again use SIM in mChe(-  
289 FUS) COS7 cells (**Figure 4A**, green in Composite). We additionally labelled lysosomes with LysoTracker  
290 Deep Red (**Figure 4A**, magenta in Composite), and segmented individual lysosomes from SIM images  
291 using a custom-written script (**Figure 4A**, where each lysosome is represented by a different colour). As  
292 a positive control, we treated mChe only control cells with chloroquine diphosphate (CQ). As an  
293 autophagy inhibitor, CQ promotes the formation and accumulation of autophagosomes, as it disrupts  
294 autophagy by preventing lysosome-autophagosome fusion (Mauthe et al., 2018). We observe that  
295 R495X (0.28 $\pm$ 0.10  $\mu\text{m}^2$  and 71 $\pm$ 12 counted lysosomes) and P525L-FUS (0.29 $\pm$ 0.12  $\mu\text{m}^2$  and 62 $\pm$ 9  
296 counted lysosomes) have larger and more numerous lysosomes in comparison to WT- (0.12 $\pm$ 0.04  $\mu\text{m}^2$

297 &  $46 \pm 5$  counted lysosomes), 9R- ( $0.15 \pm 0.05 \mu\text{m}^2$  &  $40 \pm 6$  counted lysosomes) and 16R-FUS ( $0.14 \pm 0.03$   
298  $\mu\text{m}^2$  &  $46 \pm 7$  counted lysosomes), which in turn are larger than in the control ( $0.09 \pm 0.03 \mu\text{m}^2$  and  $23 \pm 3$   
299 counted lysosomes) (**Figure 4B&C**). As expected, the effect is most prominent in the CQ-added control  
300 sample ( $0.61 \pm 0.17 \mu\text{m}^2$  and  $78 \pm 14$  counted lysosomes).

301 To test, whether these lysosomes are still able to maintain their low physiological pH, the latter  
302 of which is essential to maintain protein homeostasis, we employ Dextran 10,000 MW tagged to Oregon  
303 Green 488 (Dex-OG488), which has been used as a pH sensor in a fluorescence lifetime-based assay  
304 (Burdikova et al., 2015). Dex-OG488 accumulates in acidic compartments including lysosomes within  
305 cells (**Figure 4D**, Composite), hence can be used as an *in situ*, non-invasive lysosomal pH sensor. We  
306 measured Dex-OG488 fluorescence lifetime ( $\tau_{\text{Dex-OG488}}$ ) using FLIM and analysed resulting data using fit-  
307 free phasor plot analysis. We see modest increases in  $\tau_{\text{Dex-OG488}}$  for the nuclear-localised FUS variants,  
308 i.e.,  $3.92 \pm 0.99\%$ ,  $3.67 \pm 0.95\%$  (9R) and  $4.31 \pm 0.72\%$  (16R), in comparison to control cells, which indicates  
309 a rise in lysosomal pH. The differences become more significant for the NLS-mutants, i.e.,  $9.61 \pm 0.84\%$   
310 (R495X) and  $9.66 \pm 0.67\%$  (P525L), as well as CQ-treated control and P525L-FUS ( $48.4 \pm 2.4\%$  and  
311  $52.4 \pm 1.44\%$ , respectively) (**Figure 4E&F**). This is unsurprising as CQ is known to accumulate within  
312 lysosomes as a deprotonated weak base, and thereby increases lysosomal pH (Chen et al., 2011). In  
313 summary, we see that the dilated lysosomes in ALS-associated P525L- and R495X-FUS have lost their  
314 functionality due to greater lysosomal de-acidification.



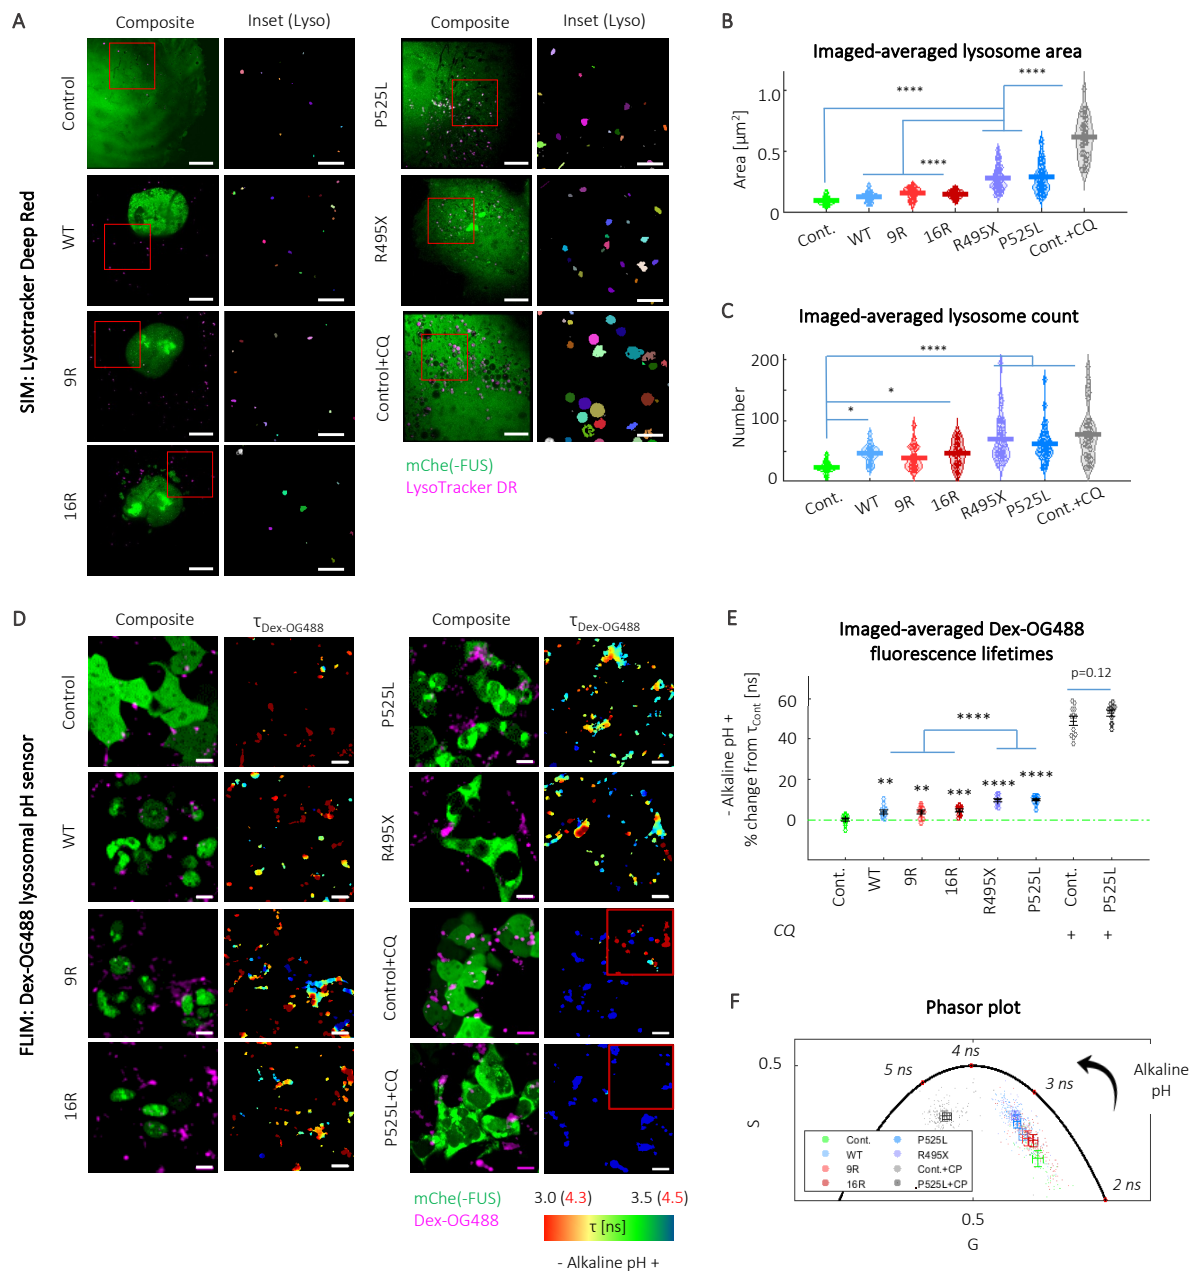

315

316 **Figure 4: ALS-associated FUS mutants increase lysosomal size and biogenesis, and impact lysosomal pH.** (A–C) SIM  
 317 measurements to visualise lysosomal structure using LysoTracker Deep Red staining. (A) Composite SIM images showing  
 318 mCh(-FUS) in green and LysoTracker Deep Red in magenta (first column, Composite). Inset corresponds to region within the  
 319 red box in the Composite image, where individually segmented lysosomes are represented by a different colour. Scale bar, 10  
 320  $\mu\text{m}$ . (B) Averaged lysosome area and (C) averaged lysosome count, which show that NLS-mutants, P525L and R495X have  
 321 more, and Control+CQ has significantly more dilated lysosomes, in comparison to the control and nuclear-localised FUS  
 322 variants. (D–F) FLIM measurements on Dex-OG488 lysosomal pH sensor. (D) Composite fluorescence intensity images  
 323 showing mCh(-FUS) in green and Dex-OG488 in magenta (first column, Composite). The latter is used as a non-invasive  
 324 lysosomal pH sensor with fluorescence lifetime-based readouts shown as falsely coloured images (second column,  $\tau_{\text{Dex-OG488}}$ ).

325 Scale bar, 10  $\mu\text{m}$ . (E) Fit-free phasor plot showing fluorescence lifetime measurements for cell samples, where anti-clockwise  
326 direction indicates higher fluorescence lifetime and more alkaline pH. (F) Quantification of fluorescence lifetimes. Analysis is  
327 based on 12 images over three biological repeats. Analysis is based on 30–57 cells over three biological repeats. One-way  
328 ANOVA (with Holm-Sidak's multiple comparison test), where n.s. is not significant, \*\* is  $p < 0.005$ , \*\*\* is  $p < 0.001$  and \*\*\*\* is  
329  $p < 0.0001$ .

330 The presence of aberrant FUS aggregation promotes the nuclear translocation of TFEB  
331 but not autophagy

332 We have observed that greater lysosomal de-acidification leads to increased lysosomal biogenesis, both  
333 of which are enhanced in mutant P525L- and R495X-FUS. De-acidification of lysosomes may trigger  
334 autophagy via the nuclear translocation of TFEB, which is a transcriptional modulator for the  
335 autophagy-lysosomal pathway (ALP). The latter has been identified as a therapeutic target for diseases  
336 involving lysosomal dysfunction (Tan et al., 2021; Willett et al., 2017). Under physiological conditions,  
337 TFEB is phosphorylated and remains in the cytoplasm. Nuclear translocation and activation of the TFEB  
338 pathway are usually triggered under conditions of starvation and lysosomal stress, leading to  
339 autophagosome formation, and increased lysosomal biogenesis that upregulates autophagy  
340 (Settembre et al., 2011). Highly expressed in the central nervous system, the dysfunction of TFEB has  
341 been implicated in the pathogenesis of numerous neurodegenerative diseases including ALS/FTD (Chen  
342 et al., 2015). We thus addressed the role of the TFEB when it translocates from the cytoplasm to the  
343 nucleus. Upon co-transfection with GFP-TFEB into mCh(-FUS) HEK293T cells, we observe that there is  
344 greater nuclear translocation of TFEB when FUS is co-expressed, which in turn is amplified in the NLS-  
345 FUS mutants, P525L and R495X (**Figure 5A&B**). We quantify this as the ratio of nuclear to cytoplasmic  
346 fluorescence of GFP-TFEB from widefield images (**Figure 5C**,  $I_{\text{Nuc}}/I_{\text{Cyto}}$ ), and validate that the observed  
347 effect is predominantly due to FUS expression, as all FUS-expressing cells have  $I_{\text{Nuc}}/I_{\text{Cyto}}$  (e.g.,  $1.3 \pm 0.23$   
348 to  $1.73 \pm 0.27$  for WT- and P525L-FUS, respectively) that are significantly increased compared to the  
349 control cells ( $0.79 \pm 0.17$ ). Control cells were also treated with CQ, which is a known stressor for  
350 lysosomal dysfunction, hence result in the induction of nuclear translocation of TFEB (Roczniak-

351 Ferguson et al., 2012a) As expected, Control+CQ gives the greatest  $I_{Nuc}/I_{Cyto}$  of  $2.35 \pm 0.31$  with 98% of  
 352 cells showing nuclear translocation (i.e.,  $I_{Nuc}/I_{Cyto} > 1$ ); the latter is similar to both R495X and P525L at  
 353 86% and 90%, respectively.

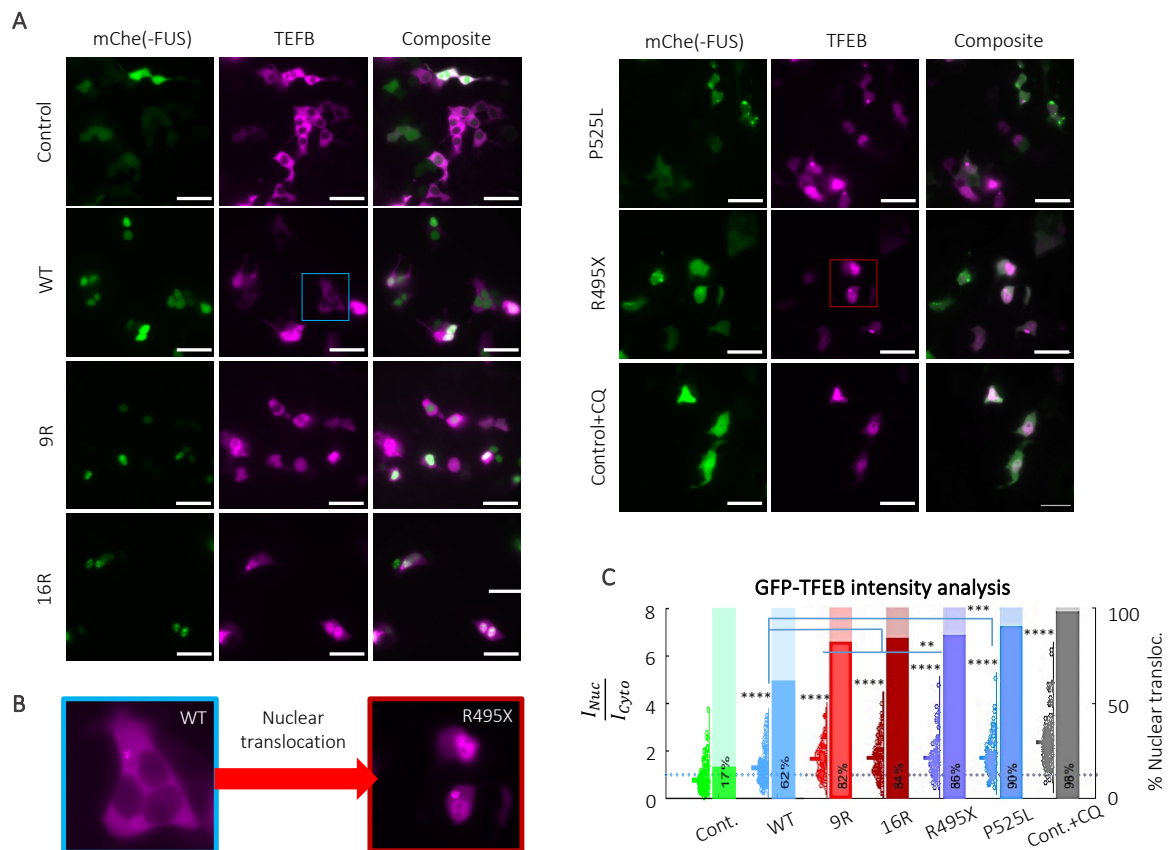

354

355 **Figure 5: Nuclear translocation of TFEB is promoted by FUS accumulation, and in particular for ALS-associated mutants. (A)**  
 356 Widefield fluorescence intensity images showing mCh(-FUS) in green, GFP-TFEB in magenta and their composite image for  
 357 all samples tested. Scale bar, 10  $\mu$ m. (B) Images showing cytoplasmic TFEB expression in WT-FUS, and nuclear translocation in  
 358 ALS-associated R495X-FUS. (C) Quantification of nuclear to cytoplasmic GFP-TFEB intensities (violin plot, primary y-axis), and  
 359 their corresponding value of nuclear translocation (bar chart, secondary y-axis), based on images in (A). Mean and S.E.M.  
 360 values of  $I_{Nuc}/I_{Cyto}$ :  $0.79 \pm 0.17$  (Control),  $1.31 \pm 0.23$  (WT),  $1.68 \pm 0.23$  (9R),  $1.72 \pm 0.26$  (16R),  $1.70 \pm 0.23$  (R495X),  $1.73 \pm 0.27$   
 361 (P525L) and  $2.35 \pm 0.31$  (Control+CQ). Analysis is based on 62–200 cells over three biological repeats. One-way ANOVA (with  
 362 Holm-Sidak's multiple comparison test), where n.s. is not significant, \*\* is  $p < 0.005$ , \*\*\* is  $p < 0.001$  and \*\*\*\* is  $p < 0.0001$ .

363

364           We have shown that the presence of FUS accumulation in cells could act as a stressor leading  
365 to a loss in acidification of lysosomes, the latter of which trigger the cytoplasmic to nuclear translocation  
366 of TFEB, as indicated by the increase in lysosomal biogenesis observed. To address if autophagy is  
367 initiated beyond lysosomal biogenesis, we performed Western Blot analysis for autophagy markers, i.e.,  
368 p62 and LC3 (**Figure S8A&B**). With FUS accumulation, we observe a slight upregulation of p62, but not  
369 of LC3-II, both of which indicate that autophagy is inhibited at this early stage. The most significant  
370 difference occurs upon addition of CQ to the control, which drives up normalised LC3-II and p62 by 2-  
371 and 5-fold, respectively (**Figure S8B**). Furthermore, a FLIM-based aggregation assay was performed on  
372 both GFP-labelled control and P525L-FUS cells, treated with CQ, and rapamycin (i.e., an autophagy  
373 inducer). Of the latter, a relatively low concentration of 20 nM introduced in serum-starved media was  
374 used, as higher concentrations led to cell death. Fluorescence lifetime of the GFP tag remains the same  
375 for P525L-FUS, indicating that there are no changes in the aggregation state of FUS within the cells  
376 (**Figure S8C&D**). We thus show that autophagy, and therefore the clearance and degradation of FUS  
377 (and other proteins) are inhibited, despite activation of the TFEB-lysosomal pathway. Moreover, at this  
378 stage, rapamycin is either toxic to cells at higher doses or not efficacious in reducing FUS aggregation  
379 at lower concentrations.

## 380 Discussion

381 The experimental data described here reveal that intracellular FUS accumulation leads to i) cytoskeletal  
382 and organelle dysfunction and ii) perturbations in cellular homeostasis. To study the latter, we not only  
383 analysed different cellular FUS and stress-related models with unprecedented detail but also developed  
384 an approach with which we could determine the level of viscosity in live cells.

385 From a micro-rheological standpoint, the liquid condensed state of FUS is a viscoelastic Maxwell  
386 fluid, possessing both viscous liquid and elastic solid behaviour (Jawerth et al., 2020). As part of this  
387 study, we have developed an approach, based on correlative SPT and FLIM to measure intracellular FUS  
388 viscosity. This provides a higher throughput method than FRAP, commonly used in this field, as several  
389 condensates can be imaged simultaneously. Moreover, this approach allows us to probe condensates  
390 which are smaller than those suitable for more conventional FRAP analysis. It provides a robust route  
391 to quantifying this intracellular viscosity, for which there is no existing tool that is widely applicable in  
392 the field. We find that NLS-mutants of FUS, P525L- and R495X-FUS, contain more viscous aggregates in  
393 comparison to WT-FUS cells. Of the two FUS mutant variants studied, P525L-FUS has the greater  
394 aggregation propensity, leading to higher accumulation of drug-induced intranuclear aggregates and  
395 SGs. We further show that these mutant variants are also associated with a loss in cytoskeletal  
396 mechanoproperties in the cytoplasm, as seen by significant impairment of their actin and tubulin  
397 networks. As part of our study, we used SiR-dyes which permit this effect to be captured in live cells, as  
398 current studies typically rely on immunofluorescence staining of fixed samples. We further  
399 corroborated this using non-fluorescence-based, physical FD-AFM measurements, which show that  
400 P525L has half the apparent Young's modulus value of WT-FUS. Similar observations in neuronal models  
401 have linked axonal cytoskeletal integrity to the proteinopathy of FUS (Castellanos-Montiel et al., 2020;  
402 Giampetruzzi et al., 2019; Theunissen et al., 2021) and other FTD/ALS-implicated proteins, e.g., TAR  
403 DNA-binding protein (TDP43) (Baskaran et al., 2018; Briese et al., 2020). This includes a related study in  
404 *Xenopus laevis* retinal ganglion cells that demonstrated P525L-FUS reduces actin density specifically in

405 growth cones, resulting in localised softening of the axon(van Tartwijk et al., 2022). Furthermore,  
406 several ALS-linked genes that directly impair cytoskeletal dynamics (Castellanos-Montiel et al., 2020;  
407 Garone et al., 2020). We further observe that NLS-FUS mutant cells undergo DNA decondensation. At  
408 physiological conditions, nuclear-localised FUS regulates DNA repair through its interactions with  
409 HDAC1, which becomes dramatically reduced in the case of mutant FUS (Naumann et al., 2018; Wang  
410 et al., 2013; Yang et al., 2014) and can in turn increase euchromatin formation (Dinant et al., 2008;  
411 Lukas et al., 2011; Miller et al., 2010). Since epigenetic and chromatin regulatory factors are also phase  
412 separating in the nucleus (Gibson et al., 2019; Larson et al., 2017; Sanulli et al., 2019; Strom et al., 2017),  
413 it is conceivable that mutant, and thus more viscous FUS in the nucleus may also affect epigenetic and  
414 chromatin regulatory factors and thereby further enhance euchromatin formation.

415 We, among others, have recently shown that the dysfunction of common biochemical  
416 pathways which attenuate organelle function (e.g., lysosomes, ER, mitochondria), are prevalent to  
417 multiple neurodegenerative disease(Fowler et al., 2019; Koh et al., 2019; Lu et al., 2020). In  
418 combination, they lead to a loss in cellular integrity, and eventually culminate in neuronal dysfunction.  
419 To address organelle distribution and function in various cellular FUS and stress-induced models, we  
420 applied several different imaging techniques and assays. With ALS-associated mutant P525L-FUS, we  
421 observe that increased lysosomal biogenesis leads to lysosomal clustering, as well as mitochondria  
422 clustering, at the perinuclear region of cells. As a result, we see a decline in tubular ER due to the loss  
423 in lysosomal distribution throughout the cell cytoplasm. Tubular ER is predominantly found in axons,  
424 where it modulates synaptic calcium for neurotransmitter release (de Juan-Sanz et al., 2017), and  
425 supplies membranes and proteins for synaptic function(Gómez-Suaga et al., 2019). Hence any  
426 disruption to its function may have significant consequences for neurons. Additionally, the tubular ER  
427 also regulates mitochondrial fission (Merkwirth and Langer, 2008), and thus the mitochondria  
428 clustering seen in FUS-expressing cells may influence the latter. P525L-FUS has the largest effect on  
429 mitochondria shape, as indicated by the significant loss of eccentricity, i.e., the mitochondria become  
430 more circular from a tubular structure, which may stem from the effect of FUS on mitochondrial fission.

431 Many of the above results point towards a dysregulation of the ALP which is supported by  
432 previous studies showing aberrant FUS aggregation disrupts the latter (Baskoylu et al., 2022; Soo et al.,  
433 2015). We observe cytoplasmic to nuclear translocation of TFEB in the presence of FUS accumulation,  
434 which we relate to the higher intralysosomal pH measured in FUS cells. In association, we observe  
435 increased lysosomal biogenesis in the absence of changes to autophagy levels. These results support  
436 the key role TFEB plays in autophagy regulation, and hence the adverse effects its dysfunction yields.  
437 Despite using non-neuronal HEK293T and COS7 cells, we believe the underlying mechanisms observed  
438 should hold true for a more physiologically relevant model. In support of this, it was recently shown  
439 that there is impaired autophagy and neuronal dysfunction in a P525L-FUS knock in *C. elegans* model  
440 (Baskoylu et al., 2022). Moreover, our findings align with the fact that autophagy dysfunction occurs  
441 early on in disease pathology, which acts as an accelerator for neurodegeneration (Cortes and la Spada,  
442 2019). Autophagy becomes even more vital in the case of aged, i.e., non-/slow-dividing neurones. It has  
443 been shown that autophagy-deficient mice are more likely to accumulate aggregation-prone proteins,  
444 increasing the risk of neurodegeneration (Hara et al., 2006; Komatsu et al., 2006). Proper function of  
445 TFEB and lysosomes have been associated with ageing and longevity (Chang et al., 2017; Lapierre et al.,  
446 2015). A recent study has shown that promotion of lysosomal function through the overexpression of  
447 Pep4 (i.e., Cathepsin D homologue) in a yeast cell model leads to extended lifespans (Carmona-  
448 Gutiérrez et al., 2011). Interestingly, our and the above findings contrast with the interactions of TDP43  
449 and TFEB, where it has been shown that the nuclear translocation of TFEB occurs with a deficiency in  
450 the first and leads to increased lysosome/autophagosome biogenesis (Xia et al., 2016). However, the  
451 loss in TDP43 also leads to downstream impairment of lysosome-autophagosome fusion, leading to an  
452 accumulation of autophagic vesicles, and thus both TDP43 and FUS models display autophagy  
453 dysfunction. Further studies will be required to pinpoint the exact mechanisms of TFEB-lysosomal  
454 dysfunction as well as its impact on organelles, in the presence of aberrant FUS aggregation.  
455 Interestingly, many of the defects we have observed as part of our study pinpoint towards an induction  
456 of early senescence, such as loss of cellular mechanoproperties, increased euchromatin formation, and

457 loss of protein homeostasis. Aberrant phase transition of FUS had been hypothesised to drive cellular  
458 ageing by others in the field (Alberti and Hyman, 2016). It thus remains to be determined whether  
459 neuronal cells indeed undergo early senescence as part of a cellular stress induced by aberrant FUS and  
460 whether the latter precedes the formation of FUS condensates.

461         There is no current therapeutic strategy for ALS/FTD and many other neurodegenerative  
462 diseases. Autophagy inducers, e.g., rapamycin, have been proposed as treatments to alleviate aberrant  
463 FUS aggregation (Zhang et al., 2011). However, in our cell models, we did not observe any alleviation in  
464 FUS aggregation upon rapamycin treatment. We have previously proposed that perinuclear lysosomal  
465 clustering leading to the collapse of the ER network could be a hallmark mechanism across  
466 neurodegenerative disease (Lu et al., 2020). Moreover, this has a further impact on cellular integrity  
467 and function. For FUS, this is additionally seen in the depolymerisation of cytoskeletal proteins. Hence,  
468 potential therapeutic strategies may want to be targeted towards alleviating cytoskeletal defects,  
469 organelle dysfunction and perturbations in cellular homeostasis, rather than solely towards aberrant  
470 protein aggregation.

471         Our study paints a picture of the effect of aberrant FUS condensates which is highly complex,  
472 and impacts many key cellular structures/functions, such as the cytoskeleton, organelles, and cellular  
473 homeostasis, which in turn, cannot be alleviated by targeting only one of these defects. Interestingly,  
474 many of the above defects mimic signs of early senescence. Indeed, similar features resembling cellular  
475 senescence have also been described in other neurodegenerative (Martínez-Cué and Rueda, 2020;  
476 Sahu et al., 2022). It remains to be determined whether aberrant proteins first trigger a stress response  
477 that affects major cellular functions, such as related to cellular senescence, before or after the  
478 formation of aberrant condensates/aggregates. Understanding the latter, will have a major impact on  
479 the understanding common factors underlying neurodegenerative diseases and for the development  
480 of new therapeutic approaches.

481



## 482 Materials and Methods

### 483 Preparation of recombinant FUS condensates

484 For both SPT and FLIM measurements, equal amounts of GFP and SNAP-tagged recombinant WT-FUS protein  
485 (yielding a total protein concentration of 6  $\mu$ M) were gently mixed into an aqueous solution of 20 % PEG-35 (Merck  
486 KGaA, Darmstadt, Germany) and 500 mM KCl (Merck KGaA) in a protein lo-bind tube (Eppendorf, Hamburg,  
487 Germany). Both recombinant proteins were a gift from the Alberti group (Max Planck Institute of Molecular Cell  
488 Biology and Genetics, Dresden, Germany). For the formation of fibrils, 20% PEG-35 was omitted from the mixture,  
489 and the solution was incubated for 20 mins at room temperature before imaging. Recombinant WT-FUS proteins  
490 were a gift from the Alberti group (Max Planck Institute of Molecular Cell Biology and Genetics, Germany). For  
491 SPT, the aqueous solution also included a  $10^{-5}$  dilution of 40 nm fluorescence nanoparticles (FluoSpheres  
492 carboxylate-modified microspheres, red-orange fluorescence, ThermoFisher Scientific, Waltham, MA, USA), and  
493 the solution was sonicated for 15 minutes before each use. 7  $\mu$ L of the condensate mixtures was deposited in a  
494 silicon well (Press-to-Seal, ThermoFisher Scientific) attached on 1.5 thickness coverslips (Superior Marienfeld,  
495 Lauda-Konigshofen, Germany) for ageing and imaging.

### 496 Cell culture

497 COS7 and HEK293T cells (American Type Cell Culture, Manassas, VA, USA) were cultured in T25/T75 cell flasks  
498 with media, were incubated at 37 °C and 5% CO<sub>2</sub>. Culture media comprised of 90 v/v% Dulbecco's Modified Eagle's  
499 Media (DMEM, ThermoFisher Scientific), 10 v/v% foetal bovine serum (FBS, ThermoFisher Scientific), and 2 mM  
500 each of glutamax (ThermoFisher Scientific) and 2% penicillin-streptomycin (ThermoFisher Scientific). Cells were  
501 passaged when 80–90% confluency was reached (i.e., twice a week). Cells were plated into 8 well plates ( $\mu$ Slide 8  
502 Well, IBIDI GmbH, Gräfelfing, Germany) to achieve 70-80% confluency on the day of imaging. For hypomethylated  
503 intranuclear aggregates, 20  $\mu$ M adenosine periodate, oxidase (AdOx, Merck KGaA, Darmstadt, Germany) were  
504 added to cell media 24 hours before imaging. 2.5  $\mu$ M sodium arsenite (Merck KGaA) was added to cell media 90  
505 minutes before imaging for stress granule formation.

### 506 FUS expression plasmids & cell transfection

507 HEK293T stable cell lines expressing GFP only control as well as GFP-WT, P525L and R495X-FUS were synthesised  
508 using lentivirus-based constructs. FUS plasmids were a gift from Dr. S. Qamar (Cambridge Institute for Dementia  
509 Research (CIMR))(Qamar et al., 2018).

510 Cells were plated overnight in antibiotics-free media to achieve 40–70% confluency on the day of  
511 transfection. For 8 well transfections, 200 ng of DNA plasmid and 0.6  $\mu$ L Lipofectamine 2000 reagent  
512 (ThermoFisher Scientific) were mixed into 60  $\mu$ L OptiMEM (ThermoFisher Scientific) and incubated at room  
513 temperature for 20 minutes. The DNA-lipid mixture was then added into media of the desired well and incubated  
514 for 4–6 hours at 37 °C. Media change into antibiotics-added media was performed after, and the cells were  
515 further incubated for 20 hours before imaging.

## 516 Fluorescence lifetime imaging microscopy (FLIM)

517 Samples were imaged on a home-built confocal fluorescence microscope equipped with a time-correlated single  
518 photon counting (TCSPC) module. A pulsed, supercontinuum laser (Fianium Whitelase, NKT Photonics,  
519 Copenhagen, Denmark) provided excitation a repetition rate of 40 MHz. This was passed into a commercial  
520 microscope frame (IX83, Olympus, Tokyo, Japan) through a 60x oil objective (PlanApo 60XOSC2, 1.4 NA, Olympus).  
521 For GFP-labelled *in vitro* system and HEK293T cells, and OG488-Dex in HEK293T cells, the excitation and emission  
522 beams are filtered through GFP-appropriate bandpass filters centred at 474 and 542 (FF01-474/27-25, FF01-  
523 542/27, Semrock Inc., NY, USA). Laser scanning was performed using a galvanometric mirror system  
524 (Quadscanner, Aberrior, Gottingen, Germany). Emission photons were collected on a photon multiplier tube  
525 (PMT, PMC150, B&H GmbH, Berlin, Germany) and relayed to a time-corelated single photon counting card  
526 (SPC830, B&H GmbH). Images were acquired at 256x256 pixels for 120 s (i.e., 10 cycles of 12 s). Photon counts  
527 were kept below 1% of laser emission photon (i.e., SYNC) rates to prevent photon pile-up. TCSPC images were  
528 analysed using an in-house, MATLAB-based (MathWorks, Natnick, MA, USA) phasor plot analysis script  
529 (<https://github.com/LAG-MNG-CambridgeUniversity/TCSPCPhasor>), from which fluorescence lifetime maps and  
530 phasor plots were generated. FLIM results presented are based on 3 biological repeats for HEK293T cells and 3  
531 individual protein preparations for recombinant FUS condensates.

## 532 Single particle tracking (SPT) in recombinant FUS condensates

533 The widefield microscope uses an IX83 (Olympus) frame, and excitation light is provided by a 4-wavelength LED  
534 source powered by a DC4100 driver (Thorlabs, Newton, NJ, USA). GFP and red-orange fluorescence FluoSpheres  
535 were imaged using microscope filter cube sets for GFP and m-Cherry, through a 60x oil immersion objective lens  
536 (PlanApo 60XOSC2, 1.4 NA, Olympus) and a Xyla sCMOS camera (Andor, Belfast, UK). For SPT trajectories, 1000  
537 frames were captured at a frame rate of ~50 frames per second.

538 SPT analysis was used to calculate the intra-condensate viscosity. Nanoparticles within condensates were located,  
539 and their coordinates were tracked over the time frames. Neighbouring coordinates were linked together based  
540 on their time points in the image sequence, yielding a 2-dimensional trajectory of the tracked nanoparticle.  
541 Adopting a passive micro-rheology approach, it is assumed that random motion of the nanoparticle is due to  
542 thermal fluctuations.(Crocker and Grier, 1996) Mean square displacement (MSD) profiles of individual  
543 nanoparticles were extracted. Stokes-Einstein equation (Equation 1) was used to calculate viscosity ( $\mu$ ).

544 Equation 1

$$545 \quad D = \frac{kT}{6\pi\mu R}$$

546 where D is diffusion coefficient, k is the Boltzmann's constant, T is temperature (i.e., 298 K), R is nanoparticle  
547 radius (i.e., 20 nm).

## 548 Immunofluorescence staining of G3BP in fixed HEK293T

549 Cell media was removed and replaced with 4% paraformaldehyde (PFA, Merck KGaA) diluted in phosphate buffer  
550 solution (PBS, ThermoFisher Scientific). The sample was fixed for 15 minutes, before permeabilising the cells with  
551 0.1 w/v% Triton X-100 (ThermoFisher Scientific) and blocking them with 5 w/v% bovine serum albumin (BSA,  
552 Merck KGaA), both diluted in PBS for 1 hour. Between antibody incubation, three washes of 50  $\mu$ M Triton X-100  
553 (Invitrogen, ThermoFisher Scientific) in PBS (henceforth referred to as PBST) were performed. Primary anti-G3BP  
554 antibody (ab56574, abcam) was diluted at 1:200 in PBST and the cells were incubated at 4 °C overnight. Alexa  
555 Fluor 647 labelled secondary antibody (goat anti-rabbit IgG, Alexa Fluor 647, ThermoFisher Scientific) was used at  
556 a dilution of 1:400 and cells were incubated for 1 hour with the antibody at room temperature. The sample was  
557 kept wrapped in aluminium foil to prevent any bleaching especially after the addition of the secondary antibody  
558 and stored at 4 °C.

## 559 Staining and confocal imaging of the cytoskeleton in HEK293T

560 SiR-fluorogenic dyes for microtubules and f-actin (Spirochrome, Thurgau, Switzerland) were used for staining live  
561 cells at 1  $\mu$ M alongside 10  $\mu$ M verapamil (Spirochrome), followed by an incubation period of 30 minutes at 37 °C.  
562 For all stains described in this subsection, a single wash, followed by addition of fresh DMEM. Imaging was  
563 performed using the same confocal microscope setup as that of the TCSPC-FLIM. For SiR-dyes, supercontinuum  
564 excitation was passed through a bandpass excitation and emission filters centred at 632 and 700 nm respectively  
565 (FF02-632/22-25, Semrock Inc; ET700/75m Chroma, Burlington, VT, USA). Emission photons were detected using  
566 a single photon counting module avalanche photodiode (SPCM-AQRH, Excelitas Technologies, Mississauga,  
567 Canada), and images were acquired at 1024x1024 pixels. Manual masks were drawn for individual cells in each  
568 image. A MATLAB script then calculated the mean intensity values of SiR-tubulin or actin within each cell.

## 569 Force-displacement (FD-) atomic force microscopy

570 Live cells were imaged in phenol red free DMEM (ThermoFisher Scientific) in 35 mm AFM imaging cell dishes. FD-  
571 AFM measurements were performed on a BioScope Resolve (Bruker GmbH, Karlsruhe, Germany), under  
572 PeakForce QMN mode using a silicon nitride tip of 70 nm in diameter (PFQNM-LC-A-CAL, Bruker GmbH). Images  
573 were collected at a scan rate of 1 Hz and resolution of 256x256 pixels. For each individual FD curve, baseline  
574 correction was performed, followed by fitting to a linear Hertzian model with a Poisson ratio of 0.5, on NanoScope  
575 Analysis 9.4 (Bruker GmbH). Output values were imported to MATLAB in a .csv format. An automated script that  
576 selectively accepts apparent Young's modulus values calculated based on linear fitting with a coefficient of  
577 determination ( $R^2$ ) above 0.8, was used to process the data. Results were performed over 3 biological repeats.

## 578 DNA decondensation assay using SiR-DNA

579 SiR-DNA (Spirochrome) was performed using the same protocols as detailed for SiR-Tubulin and SiR-Actin. For  
580 GFP controls, cells were treated with 20  $\mu$ M AdOx (Merck KGaA) and 200 ng/mL Trichostatin A (TSA, ThermoFisher  
581 Scientific) for 24 hours and 60 minutes respectively, before imaging. TCSPC imaging and analyses were performed  
582 as previously described.

## 583 Calculating diffusion coefficient of FUS macroassemblies in live cells

584 Live cells were imaged after 90 mins of NaAsO<sub>2</sub> and 24 hours of AdOx treatment on the same widefield setup as  
585 for SPT imaging. Recordings of hypomethylated aggregate movements were capture across 1000 frames, and  
586 their diffusion coefficients were found using analysis detailed under SPT.

## 587 Overexpression, widefield imaging and analysis of TFEB

588 GFP-TFEB plasmids(Roczniak-Ferguson et al., 2012b) were transfected into cells using Lipofectamine 2000 (as  
589 detailed in the previous subsection). For imaging, the widefield microscope used is based on a IX83 (Olympus)  
590 frame, and excitation light is provided by a 4-wavelength LED source powered by a DC4100 driver (Thorlabs,  
591 Newton, NJ, USA). GFP-TFEB and mCherry-FUS were imaged using microscope filter cube sets for GFP and m-  
592 Cherry, through a 60x oil immersion objective lens (PlanApo 60XOSC2, 1.4 NA, Olympus) and a Xyla sCMOS camera  
593 (Andor, Belfast, UK). Manual masks for nuclear and cytoplasmic regions were drawn for the cells imaged.  
594 Corresponding intensity values for these areas were quantified using an in-house, automated MATLAB  
595 (MathWorks, Natnick, MA, USA) script, which also calculated nuclear to cytoplasmic intensity ratio values.

## 596 Western blot

597 HEK293T cells grown in 6 well plates were lysed by pipetting up and down in radioimmunoprecipitation assay  
598 (RIPA) buffer with added protease inhibitors (Pierce, ThermoFisher Scientific), and kept overnight at -80 °C. Upon  
599 thawing on ice, cell lysates were sonicated using an ultrasonic bath (UH-300, UltraWave, Cardiff, UK) for three 1-  
600 minute runs over 6 minutes. Protein concentration was measured using a bicinchoninic acid (BCA) assay (Pierce  
601 BCA Protein Assay Kit, ThermoFisher Scientific), and 20 mg was boiled alongside sample loading buffer (Invitrogen  
602 NuPAGE LDS 4X, ThermoFisher Scientific) for 5 minutes at 95 °C. All following reagents used were purchased from  
603 Invitrogen NuPAGE (ThermoFisher Scientific), unless otherwise stated. Samples were loaded into a pre-cast gel  
604 wells (10%, Bis-Tris, 15 well, 1 mm), with pre-stained protein ladder (PageRuler, 10 to 180 kDa, ThermoFisher  
605 Scientific), for electrophoresis in MES SDS running buffer (1x diluted in PBS from 20X). Protein transfer onto a  
606 polyvinylidene difluoride (PVDF) transfer membrane (0.45 µm, ThermoFisher Scientific) was performed in transfer  
607 buffer (1x diluted in PBS from 20X). Electrophoresis and gel transfer were performed using a XCell SureLock Mini  
608 Cell Electrophoresis System (Invitrogen ThermoFisher Scientific). The PVDF membrane was blocked in 5 w/v% milk  
609 (skim milk powder for microbiology, Millipore, Merck KGaA) in PBS for 1 hour on an orbital shaker (SC5, Stuart  
610 Equipment, ThermoFisher Scientific). The resulting membrane was then cut to allow for primary antibody staining  
611 of β-tubulin (ab15568, abcam, Cambridge, UK), f-actin (ab130935, abcam), LC3 (ab192890, abcam) and p62  
612 (ab109012, abcam); and the housekeeping gene, PCNA (ab18197, abcam) overnight at 4 °C on a tube roller (SRT6,  
613 Stuart Equipment). Secondary antibody staining using either sheep α-mouse or donkey α-rabbit (NA931V,  
614 NA934V, GE HealthCare, Chicago, IL, USA) was performed for 1 hour on a tube roller at room temperature. Three  
615 5-minute washes in 0.1 v/v% Tween-20 (Merck KGaA) in PBS was included after both primary and secondary  
616 antibody staining.

617 The blot was developed using SuperSignal West Pico PLUS Chemiluminescent Substrate (ThermoFisher  
618 Scientific) between two sheets of acrylic and imaged on a G-box (Chemi XX6, Syngene, Bengaluru, India).  
619 Quantification of protein bands was performed using a custom MATLAB script which normalises the intensity sum  
620 of each over that of PCNA.

## 621 Organelle staining/labelling in live cells

622 COS7 cells were used for all SIM experiments. mEmerald-Sec61 $\beta$ -C1 plasmids(Nixon-Abell et al., 2016) were  
623 transfected into cells using Lipofectamine 2000 (as detailed in the previous subsection). On the day of imaging,  
624 mitochondria and lysosomes were stained using MitoTracker Deep Red and LysoTracker Deep Red (ThermoFisher  
625 Scientific), at final concentrations of 200 nM and 50 nM for 30 minutes at 37 °C. Dextran, Oregon Green 488  
626 (10,000 MW, Anionic, ThermoFisher Scientific) was added to FUS-expressing cells at a final concentration of 1.25  
627  $\mu$ g/mL. They were left to incubate overnight at 37 °C. Cells were washed once in fresh media before imaging.

## 628 Structured illumination microscopy (SIM) and analysis

629 The SIM used is a home-built system that uses a spatial light modulator (SLM) for generating SIM grating patterns,  
630 as described in Young *et al.*(Young et al., 2016). Imaging was performed using a water immersion objective lens  
631 (UPLSAPO 60 XW, 60x/1.2 NA, Olympus). For GFP(-FUS), mCherry(-FUS) and MitoTracker Orange, and  
632 Mito/LysoTracker Deep Red excitation, 488 nm (iBeam SMART, Toptica, Munich, Germany), 561 nm (OBIS LS,  
633 Coherent, Santa Clara, CA, USA) and 647 nm (MLD, Cobolt AB, Stockholm, Sweden) diode lasers were used  
634 respectively. Emission light were passed through respective bandpass filters (FF01-525/30, FF01-676/29,  
635 Semrock) onto a sCMOS camera (ORCA Flash 4.0, Hamamatsu, Shizuoka, Japan) at exposure times between 10—  
636 100 ms. SIM reconstruction was performed using fairSIM, an open-source FIJI plugin (Müller et al., 2016).

## 637 Segmentation and morphological analysis of organelles

638 Batch and automated analysis were performed using a custom MATLAB script, which reads images of both  
639 channels of 2-colour SIM images as input. On the image corresponding to the organelle of interest, an intensity  
640 threshold is set to separate background from desired features. A clustering algorithm performs segmentation  
641 based on defined size criteria to ensure that individual organelles (i.e., single mitochondria or lysosome) are  
642 segmented. Ambiguous segmented objects are eliminated from further analysis. For each segmented organelle,  
643 a size (e.g., area and major length axis) and morphological (e.g., eccentricity) quantification is performed.

## 644 Statistical analyses and plotting

645 All statistical analyses were performed on Prism 6 (GraphPad, San Diego, CA, USA), where one-way ANOVA test  
646 with Holm-Sidak's multiple comparison were applied. Results are given as n.s. for not significant, \* for  $p < 0.05$ , \*\*  
647  $p < 0.01$ , \*\*\*  $p < 0.001$ , \*\*\*\*  $p < 0.0001$ . Violin plots were produced by adapting open-source MATLAB code from  
648 Anne Urai ([github.com/anne-urai](https://github.com/anne-urai)).



## 650 Acknowledgements

651 CWC is funded by the Cambridge Trust and Wolfson College for her PhD. GSKS acknowledges funding  
652 from the Wellcome Trust (065807/Z/01/Z) (203249/Z/16/Z), the UK Medical Research Council (MRC)  
653 (MR/K02292X/1), Alzheimer Research UK (ARUK) (ARUK-PG013-14), Michael J Fox Foundation (16238)  
654 and Infinitus China Ltd. PHStG-H acknowledges funding from the Canadian Institutes of Health  
655 Research (406915 Foundation Grant and Canadian Consortium on Neurodegeneration in Aging Grant),  
656 Wellcome Trust Collaborative Award (203249/Z/16/Z), US Alzheimer Society Zenith Grant (ZEN-18-  
657 529769), Alzheimer Society of Ontario Chair in Alzheimer's Disease Research and National Institute of  
658 Aging (U01AG072572; R01AG070864).

## 659 Contributions

660 Study conceptualisation and design: GSKS; Cell culture and plasmids: CWC, ADS & AM; Data collection:  
661 CWC, AJZ & IM; Data analysis: CWC & AJZ; Feedback: PHStG-H, CFK & TJPK; Draft manuscript  
662 preparation: CWC & GSKS; Manuscript editing: all authors. All authors have given approval of the final  
663 manuscript.

## 664 Declaration of interests

665 The authors declare no competing interests.

## 666 Supporting information

667 Methodology and supplementary figures (PDF)

## 668 Data availability

669 Raw data is available through Cambridge University Repository Apollo (DOI: 10.17863/CAM.83295).

670 Analysis scripts are available upon request.

## 671 References

- 672 Alberti S, Hyman AA. 2016. Are aberrant phase transitions a driver of cellular aging? *BioEssays* **38**:959–968.  
673 doi:10.1002/BIES.201600042
- 674 Aman Y, Schmauck-Medina T, Hansen M, Morimoto RI, Simon AK, Bjedov I, Palikaras K, Simonsen A, Johansen T,  
675 Tavernarakis N, Rubinsztein DC, Partridge L, Kroemer G, Labbadia J, Fang EF. 2021. Autophagy in healthy  
676 aging and disease. *Nat Aging* **1**:634–650. doi:10.1038/s43587-021-00098-4
- 677 Baron DM, Kaushansky LJ, Ward CL, Sama RRR, Chian R-J, Boggio KJ, Quaresma AJC, Nickerson JA, Bosco DA.  
678 2013. Amyotrophic lateral sclerosis-linked FUS/TLS alters stress granule assembly and dynamics. *Mol*  
679 *Neurodegener* **8**:30. doi:10.1186/1750-1326-8-30
- 680 Baskaran P, Shaw C, Guthrie S. 2018. TDP-43 causes neurotoxicity and cytoskeletal dysfunction in primary  
681 cortical neurons. *PLoS One* **13**. doi:10.1371/JOURNAL.PONE.0196528
- 682 Baskoylu SN, Chapkis N, Unsal B, Lins J, Schuch K, Simon J, Correspondence ACH, Hart AC. 2022. Disrupted  
683 autophagy and neuronal dysfunction in C.&nbsp;elegans knockin models of FUS amyotrophic lateral  
684 sclerosis. *Cell Rep* **38**:110195. doi:10.1016/j.celrep.2021.110195
- 685 Bosco DA, Lemay N, Ko HK, Zhou H, Burke C, Kwiatkowski TJ, Sapp P, Mckenna-Yasek D, Brown RH, Hayward LJ.  
686 2010. Mutant FUS proteins that cause amyotrophic lateral sclerosis incorporate into stress granules. *Hum*  
687 *Mol Genet* **19**:4160–4175. doi:10.1093/HMG/DDQ335
- 688 Briese M, Saal-Bauernschubert L, Lüningschrör P, Moradi M, Dombert B, Surrey V, Appenzeller S, Deng C,  
689 Jablonka S, Sendtner M. 2020. Loss of Tdp-43 disrupts the axonal transcriptome of motoneurons  
690 accompanied by impaired axonal translation and mitochondria function. *Acta Neuropathol Commun* **8**:1–  
691 16. doi:10.1186/S40478-020-00987-6
- 692 Burdikova Z, Svindrych Z, Pala J, Hickey CD, Wilkinson MG, Panek J, Auty MAE, Periasamy A, Sheehan JJ. 2015.  
693 Measurement of pH micro-heterogeneity in natural cheese matrices by fluorescence lifetime imaging.  
694 *Front Microbiol* **6**:183. doi:10.3389/FMICB.2015.00183
- 695 Carmona-Gutiérrez D, Bauer MA, Ring J, Knaue HR, Eisenberg T, Büttner S, Ruckenstein C, Reisenbichler A,  
696 Magnes C, Rechberger GN, Birner-Gruenberger R, Jungwirth H, Fröhlich KU, Sinner F, Kroemer G, Madeo  
697 F. 2011. The propeptide of yeast cathepsin D inhibits programmed necrosis. *Cell Death Dis* **2**:e161.  
698 doi:10.1038/CDDIS.2011.43
- 699 Castellanos-Montiel MJ, Chaineau M, Durcan TM. 2020. The Neglected Genes of ALS: Cytoskeletal Dynamics  
700 Impact Synaptic Degeneration in ALS. *Front Clinic Neurosci* **14**:380. doi:10.3389/FNCEL.2020.594975
- 701 Chang JT, Kumsta C, Hellman AB, Adams LM, Hansen M. 2017. Spatiotemporal regulation of autophagy during  
702 *Caenorhabditis elegans* aging. *Elife* **6**:e18459. doi:10.7554/ELIFE.18459
- 703 Chen PM, Gombart ZJ, Chen JW. 2011. Chloroquine treatment of ARPE-19 cells leads to lysosome dilation and  
704 intracellular lipid accumulation: Possible implications of lysosomal dysfunction in macular degeneration.  
705 *Cell Biosci* **1**:1–10. doi:10.1186/2045-3701-1-10
- 706 Chen W, Young LJ, Lu M, Zacccone A, Strohl F, Yu N, Schierle GSK, Kaminski CF. 2017. Fluorescence self-  
707 quenching from reporter dyes informs on the structural properties of amyloid clusters formed in vitro and  
708 in cells. *Nano Lett* **17**:143–149. doi:10.1021/acs.nanolett.6b03686



- 709 Chen Y, Liu H, Guan Y, Wang Q, Zhou F, Jie L, Ju J, Pu L, Du H, Wang X. 2015. The altered autophagy mediated by  
710 TFEB in animal and cell models of amyotrophic lateral sclerosis. *Am J Transl Res* **7**:1574–1587.
- 711 Conte A, Lattante S, Zollino M, Marangi G, Luigetti M, del Grande A, Servidei S, Trombetta F, Sabatelli M. 2012.  
712 P525L FUS mutation is consistently associated with a severe form of juvenile Amyotrophic Lateral  
713 Sclerosis. *Neuromuscul Disord* **22**:73–75. doi:10.1016/J.NMD.2011.08.003
- 714 Cortes CJ, la Spada AR. 2019. TFEB dysregulation as a driver of autophagy dysfunction in neurodegenerative  
715 disease: Molecular mechanisms, cellular processes, and emerging therapeutic opportunities. *Neurobiol*  
716 *Disease* **122**:83–93. doi:10.1016/J.NBD.2018.05.012
- 717 Crocker JC, Grier DG. 1996. Methods of Digital Video Microscopy for Colloidal Studies. *J Colloid Interface Sci*  
718 **179**:298–310. doi:10.1006/JCIS.1996.0217
- 719 Davidson NM, Gallimore PJ, Bateman B, Ward AD, Botchway SW, Kalberer M, Kuimova MK, Pope FD. 2020.  
720 Measurement of the fluorescence lifetime of GFP in high refractive index levitated droplets using FLIM.  
721 *Phys Chem Chem Phys* **22**:14704–14711. doi:10.1039/C9CP06395A
- 722 de Juan-Sanz J, Holt GT, Schreiter ER, de Juan F, Kim DS, Ryan TA. 2017. Axonal Endoplasmic Reticulum Ca<sup>2+</sup>  
723 Content Controls Release Probability in CNS Nerve Terminals. *Neuron* **93**:867–881.e6.  
724 doi:10.1016/j.neuron.2017.01.010
- 725 Dinant C, Houtsmuller AB, Vermeulen W. 2008. Chromatin structure and DNA damage repair. *Epigenetics*  
726 *Chromatin* **1**:9. doi:10.1186/1756-8935-1-9
- 727 Esbjörner EK, Chan F, Rees E, Erdelyi M, Luheshi LM, Bertocini CW, Kaminski CF, Dobson CM, Kaminski Schierle  
728 GS. 2014. Direct observations of amyloid  $\beta$  Self-assembly in live cells provide insights into differences in  
729 the kinetics of A $\beta$ (1-40) and A $\beta$ (1-42) aggregation. *Chem Biol* **21**:732–742.  
730 doi:10.1016/j.chembiol.2014.03.014
- 731 Fowler PC, Garcia-Pardo ME, Simpson JC, O’Sullivan NC. 2019. NeurodegenERation: The Central Role for ER  
732 Contacts in Neuronal Function and Axonopathy, Lessons From Hereditary Spastic Paraplegias and Related  
733 Diseases. *Front Neurosci* **13**:1051. doi:10.3389/FNINS.2019.01051
- 734 Fujii S, Takanashi K, Kitajo K, Yamaguchi A. 2016. Treatment with a Global Methyltransferase Inhibitor Induces  
735 the Intranuclear Aggregation of ALS-Linked FUS Mutant In Vitro. *Neurochem Res* **41**:826–835.  
736 doi:10.1007/s11064-015-1758-z
- 737 Garone MG, Alfano V, Salvatori B, Braccia C, Peruzzi G, Colantoni A, Bozzoni I, Armirotti A, Rosa A. 2020.  
738 Proteomics analysis of FUS mutant human motoneurons reveals altered regulation of cytoskeleton and  
739 other ALS-linked proteins via 3’UTR binding. *Sci Rep* **10**:1–8. doi:10.1038/s41598-020-68794-6
- 740 Giampetruzzi A, Danielson EW, Gumina V, Jeon M, Boopathy S, Brown RH, Ratti A, Landers JE, Fallini C. 2019.  
741 Modulation of actin polymerization affects nucleocytoplasmic transport in multiple forms of amyotrophic  
742 lateral sclerosis. *Nat Commun* **10**:1–15. doi:10.1038/s41467-019-11837-y
- 743 Gibson BA, Doolittle LK, Schneider MWG, Jensen LE, Gamarra N, Henry L, Gerlich DW, Redding S, Rosen MK.  
744 2019. Organization of Chromatin by Intrinsic and Regulated Phase Separation. *Cell* **179**:484.  
745 doi:10.1016/J.CELL.2019.08.037
- 746 Gómez-Suaga P, Pérez-Nievas BG, Glennon EB, Lau DHW, Paillusson S, Mórotz GM, Calì T, Pizzo P, Noble W,  
747 Miller CCJ. 2019. The VAPB-PTPIP51 endoplasmic reticulum-mitochondria tethering proteins are present

- 748 in neuronal synapses and regulate synaptic activity. *Acta Neuropathol Commun* **7**:35. doi:10.1186/s40478-  
749 019-0688-4
- 750 Gonzalez A, Mannen T, Çağatay T, Fujiwara A, Matsumura H, Niesman AB, Brautigam CA, Chook YM, Yoshizawa  
751 T. 2021. Mechanism of karyopherin- $\beta$ 2 binding and nuclear import of ALS variants FUS(P525L) and  
752 FUS(R495X). *Sci Rep* **11**:3754. doi:10.1038/s41598-021-83196-y
- 753 Hara T, Nakamura K, Matsui M, Yamamoto A, Nakahara Y, Suzuki-Migishima R, Yokoyama M, Mishima K, Saito I,  
754 Okano H, Mizushima N. 2006. Suppression of basal autophagy in neural cells causes neurodegenerative  
755 disease in mice. *Nature* **441**:885–889. doi:10.1038/nature04724
- 756 Hockings C, Poudel C, Feeney KA, Novo CL, Hamouda MS, Mela I, Fernandez-Antoran D, Vallejo-Ramirez PP,  
757 Rugg-Gunn PJ, Chalut K, Kaminski CF, Kaminski-Schierle G. 2020. Illuminating chromatin compaction in live  
758 cells and fixed tissues using SiR-DNA fluorescence lifetime. *bioRxiv*. doi:10.1101/2020.05.02.073536
- 759 Hofweber M, Hutten S, Bourgeois B, Niessing D, Madl T, Dormann Correspondence D. 2018. Phase Separation of  
760 FUS Is Suppressed by Its Nuclear Import Receptor and Arginine Methylation. *Cell* **173**:706–713.e13.  
761 doi:10.1016/j.cell.2018.03.004
- 762 Jawerth L, Fischer-Friedrich E, Saha Suropriya, Wang J, Franzmann T, Zhang X, Sachweh J, Ruer M, Ijavi M, Saha  
763 Shambaditya, Mahamid J, Hyman AA, Jülicher F. 2020. Protein condensates as aging Maxwell fluids.  
764 *Science (1979)* **370**:1317–1323. doi:10.1126/science.aaw4951
- 765 Koh JY, Kim HN, Hwang JJ, Kim YH, Park SE. 2019. Lysosomal dysfunction in proteinopathic neurodegenerative  
766 disorders: possible therapeutic roles of cAMP and zinc. *Mol Brain* **12**. doi:10.1186/S13041-019-0439-2
- 767 Komatsu M, Waguri S, Chiba T, Murata S, Iwata JI, Tanida I, Ueno T, Koike M, Uchiyama Y, Kominami E, Tanaka K.  
768 2006. Loss of autophagy in the central nervous system causes neurodegeneration in mice. *Nature*  
769 **441**:880–884. doi:10.1038/nature04723
- 770 Kuimova MK. 2012. Mapping viscosity in cells using molecular rotors. *Phys Chem Chem Phys* **14**:12671–12686.  
771 doi:10.1039/C2CP41674C
- 772 Lapierre LR, Kumsta C, Sandri M, Ballabio A, Hansen M. 2015. Transcriptional and epigenetic regulation of  
773 autophagy in aging. *Autophagy* **11**:867–880. doi:10.1080/15548627.2015.1034410
- 774 Larson AG, Elnatan D, Keenen MM, Trnka MJ, Johnston JB, Burlingame AL, Agard DA, Redding S, Narlikar GJ.  
775 2017. Liquid droplet formation by HP1 $\alpha$  suggests a role for phase separation in heterochromatin. *Nature*  
776 **547**:236–240. doi:10.1038/nature22822
- 777 Lu M, Christensen CN, Weber JM, Konno T, Läubli NF, Scherer KM, Avezov E, Lio P, Lapkin AA, Schierle GSK,  
778 Kaminski CF. 2022. ERnet: a tool for the semantic segmentation and quantitative analysis of endoplasmic  
779 reticulum topology for video-rate super-resolution imaging. *bioRxiv* 2022.05.17.492189.  
780 doi:10.1101/2022.05.17.492189
- 781 Lu M, van Tartwijk FW, Lin JQ, Nijenhuis W, Parutto P, Fantham M, Christensen CN, Avezov E, Holt CE,  
782 Tunnacliffe A, Holcman D, Kapitein L, Kaminski Schierle GS, Kaminski CF. 2020. The structure and global  
783 distribution of the endoplasmic reticulum network are actively regulated by lysosomes. *Sci Adv* **6**:7209–  
784 7225. doi:10.1126/SCIADV.ABC7209
- 785 Lukas J, Lukas C, Bartek J. 2011. More than just a focus: The chromatin response to DNA damage and its role in  
786 genome integrity maintenance. *Nat Cell Biol* **13**:1161–1169. doi:10.1038/NCB2344

- 787 Lukinavičius G, Reymond L, D'Este E, Masharina A, Göttfert F, Ta H, Güther A, Fournier M, Rizzo S, Waldmann H,  
788 Blaukopf C, Sommer C, Gerlich DW, Arndt HD, Hell SW, Johnsson K. 2014. Fluorogenic probes for live-cell  
789 imaging of the cytoskeleton. *Nat Meth* **11**:731–733. doi:10.1038/nmeth.2972
- 790 Ma Y, Wen K, Liu M, Zheng J, Chu K, Smith ZJ, Liu L, Gao P. 2021. Recent advances in structured illumination  
791 microscopy. *J Phys Photonics* **3**:24009. doi:10.1088/2515-7647/abdb04
- 792 Martínez-Cué C, Rueda N. 2020. Cellular senescence in neurodegenerative diseases. *Front Cell Neurosci* **14**:16.  
793 doi:10.3389/FNCEL.2020.00016/BIBTEX
- 794 Martini-Stoica H, Xu Y, Ballabio A, Zheng H. 2016. The Autophagy–Lysosomal Pathway in Neurodegeneration: A  
795 TFEB Perspective. *Trends Neurosci* **39**:221–234. doi:10.1016/J.TINS.2016.02.002
- 796 Mattenberger Y, James DI, Martinou JC. 2003. Fusion of mitochondria in mammalian cells is dependent on the  
797 mitochondrial inner membrane potential and independent of microtubules or actin. *FEBS Lett* **538**:53–59.  
798 doi:10.1016/S0014-5793(03)00124-8
- 799 Mauthe M, Orhon I, Rocchi C, Zhou X, Luhr M, Hijlkema KJ, Coppes RP, Engedal N, Mari M, Reggiori F. 2018.  
800 Chloroquine inhibits autophagic flux by decreasing autophagosome-lysosome fusion. *Autophagy* **14**:1435–  
801 1455. doi:10.1080/15548627.2018.1474314
- 802 Merkwirth C, Langer T. 2008. Mitofusin 2 Builds a Bridge between ER and Mitochondria. *Cell* **135**:1165–1167.  
803 doi:10.1016/j.cell.2008.12.005
- 804 Miller KM, Tjeertes J v., Coates J, Legube G, Polo SE, Britton S, Jackson SP. 2010. Human HDAC1 and HDAC2  
805 function in the DNA-damage response to promote DNA nonhomologous end-joining. *Nat Struc Mol Biol*  
806 **17**:1144–1151. doi:10.1038/NSMB.1899
- 807 Moreira JMA, Scheipers P, Sørensen P. 2003. The histone deacetylase inhibitor Trichostatin A modulates CD4+ T  
808 cell responses. *BMC Cancer* **3**:1–18. doi:10.1186/1471-2407-3-30/FIGURES/7
- 809 Müller M, Mönkemöller V, Hennig S, Hübner W, Huser T. 2016. Open-source image reconstruction of super-  
810 resolution structured illumination microscopy data in ImageJ. *Nat Commun* **7**:1–6.  
811 doi:10.1038/ncomms10980
- 812 Murakami T, Qamar S, Lin JQ, Schierle GSK, Rees E, Miyashita A, Costa AR, Dodd RB, Chan FTS, Michel CH,  
813 Kronenberg-Versteeg D, Li Y, Yang SP, Wakutani Y, Meadows W, Ferry RR, Dong L, Tartaglia GG, Favrin G,  
814 Lin WL, Dickson DW, Zhen M, Ron D, Schmitt-Ulms G, Fraser PE, Shneider NA, Holt C, Vendruscolo M,  
815 Kaminski CF, St George-Hyslop P. 2015. ALS/FTD Mutation-Induced Phase Transition of FUS Liquid  
816 Droplets and Reversible Hydrogels into Irreversible Hydrogels Impairs RNP Granule Function. *Neuron*  
817 **88**:678–690. doi:10.1016/j.neuron.2015.10.030
- 818 Naumann M, Pal A, Goswami A, Lojewski X, Japtok J, Vehlow A, Naujock M, Günther R, Jin M, Stanslowsky N,  
819 Reinhardt P, Sternecker J, Frickenhaus M, Pan-Montojo F, Storkebaum E, Poser I, Freischmidt A,  
820 Weishaupt JH, Holzmann K, Troost D, Ludolph AC, Boeckers TM, Liebau S, Petri S, Cordes N, Hyman AA,  
821 Wegner F, Grill SW, Weis J, Storch A, Hermann A. 2018. Impaired DNA damage response signaling by FUS-  
822 NLS mutations leads to neurodegeneration and FUS aggregate formation. *Nat Commun* **9**:1–17.  
823 doi:10.1038/s41467-017-02299-1
- 824 Nixon-Abell J, Obara CJ, Weigel A v., Li D, Legant WR, Xu CS, Pasolli HA, Harvey K, Hess HF, Betzig E, Blackstone  
825 C, Lippincott-Schwartz J. 2016. Increased spatiotemporal resolution reveals highly dynamic dense tubular  
826 matrices in the peripheral ER. *Science (1979)* **354**. doi:10.1126/SCIENCE.AAF3928

- 827 Novo CL, Wong E v., Hockings C, Poudel C, Sheekey E, Wiese M, Okkenhaug H, Boulton SJ, Basu S, Walker S,  
828 Kaminski Schierle GS, Narlikar GJ, Rugg-Gunn PJ. 2022. Satellite repeat transcripts modulate  
829 heterochromatin condensates and safeguard chromosome stability in mouse embryonic stem cells. *Nat*  
830 *Commun* **13**:1–16. doi:10.1038/s41467-022-31198-3
- 831 Pu J, Guardia CM, Keren-Kaplan T, Bonifacino JS. 2016. Mechanisms and functions of lysosome positioning. *J Cell*  
832 *Sci* **129**:4329. doi:10.1242/JCS.196287
- 833 Qamar S, Wang GZ, Randle SJ, Ruggeri FS, Varela JA, Lin JQ, Phillips EC, Miyashita A, Williams D, Ströhl F,  
834 Meadows W, Ferry R, Dardov VJ, Tartaglia GG, Farrer LA, Kaminski Schierle GS, Kaminski CF, Holt CE,  
835 Fraser PE, Schmitt-Ulms G, Klenerman D, Knowles T, Vendruscolo M, St George-Hyslop P. 2018. FUS Phase  
836 Separation Is Modulated by a Molecular Chaperone and Methylation of Arginine Cation- $\pi$  Interactions.  
837 *Cell* **173**:720-734.e15.
- 838 Rocznik-Ferguson A, Petit CS, Froehlich F, Qian S, Ky J, Angarola B, Walther TC, Ferguson SM. 2012a. The  
839 Transcription Factor TFEB Links mTORC1 Signaling to Transcriptional Control of Lysosome Homeostasis. *Sci*  
840 *Signal* **5**:ra42. doi:10.1126/SCISIGNAL.2002790
- 841 Rocznik-Ferguson A, Petit CS, Froehlich F, Qian S, Ky J, Angarola B, Walther TC, Ferguson SM. 2012b. The  
842 transcription factor TFEB links mTORC1 signaling to transcriptional control of lysosome homeostasis. *Sci*  
843 *Signal* **5**. doi:10.1126/SCISIGNAL.2002790
- 844 Sahu MR, Rani L, Subba R, Mondal AC. 2022. Cellular senescence in the aging brain: A promising target for  
845 neurodegenerative diseases. *Mech Ageing Dev* **204**:111675. doi:10.1016/J.MAD.2022.111675
- 846 Sama RRK, Ward CL, Kaushansky LJ, Lemay N, Ishigaki S, Urano F, Bosco DA. 2013. FUS/TLS assembles into stress  
847 granules and is a prosurvival factor during hyperosmolar stress. *J Cell Physiol* **228**:2222.  
848 doi:10.1002/JCP.24395
- 849 Sanulli S, Trnka MJ, Dharmarajan V, Tibble RW, Pascal BD, Burlingame AL, Griffin PR, Gross JD, Narlikar GJ. 2019.  
850 HP1 reshapes nucleosome core to promote phase separation of heterochromatin. *Nature* **575**:390–394.  
851 doi:10.1038/s41586-019-1669-2
- 852 Schwerk C, Schulze-Osthoff K. 2005. Methyltransferase inhibition induces p53-dependent apoptosis and a novel  
853 form of cell death. *Oncogene* **24**:7002–7011. doi:10.1038/sj.onc.1208855
- 854 Settembre C, di Malta C, Polito VA, Arcencibia MG, Vetrini F, Erdin S, Erdin SU, Huynh T, Medina D, Colella P,  
855 Sardiello M, Rubinsztein DC, Ballabio A. 2011. TFEB links autophagy to lysosomal biogenesis. *Science*  
856 (1979) **332**:1429–1433. doi:10.1126/SCIENCE.1204592
- 857 Soo KY, Sultana J, King AE, Atkinson R, Warraich ST, Sundaramoorthy V, Blair I, Farg MA, Atkin JD. 2015. ALS-  
858 associated mutant FUS inhibits macroautophagy which is restored by overexpression of Rab1. *Cell Death*  
859 *Disc* **1**:15030. doi:10.1038/cddiscovery.2015.30
- 860 Strom AR, Emelyanov A v., Mir M, Fyodorov D v., Darzacq X, Karpen GH. 2017. Phase separation drives  
861 heterochromatin domain formation. *Nature* **547**:241–245. doi:10.1038/nature22989
- 862 Tan A, Prasad R, Jho E hoon. 2021. TFEB regulates pluripotency transcriptional network in mouse embryonic  
863 stem cells independent of autophagy–lysosomal biogenesis. *Cell Death Dis* **12**:1–14. doi:10.1038/s41419-  
864 021-03632-9

- 865 Theunissen F, West PK, Brennan S, Petrović B, Hooshmand K, Akkari PA, Keon M, Guennewig B. 2021. New  
866 perspectives on cytoskeletal dysregulation and mitochondrial mislocalization in amyotrophic lateral  
867 sclerosis. *Transl Neurodegener* **10**:1–16. doi:10.1186/S40035-021-00272-Z
- 868 van Tartwijk FW, Wunderlich LCS, Mela I, Makarchuk S, Jakobs M, Qamar S, Franze K, Kaminski Schierle GS, St  
869 George-Hyslop P, Lin JQ, Holt CE, Kaminski CF. 2022. Mutation of the ALS/FTD-associated RNA-binding  
870 protein FUS alters axonal cytoskeletal organisation . *bioRxiv*. doi:10.1101/2022.10.04.510780
- 871 Vigushin DM, Ali S, Pace PE, Mirsaidi N, Ito K, Adcock I, Charles Coombes R. 2001. Trichostatin A Is a Histone  
872 Deacetylase Inhibitor with Potent Antitumor Activity against Breast Cancer in Vivo 1. *Clin Cancer Res*  
873 **7**:971–976.
- 874 Waibel S, Neumann M, Rabe M, Meyer T, Ludolph AC. 2010. Novel missense and truncating mutations in  
875 FUS/TLS in familial ALS. *Neurol* **75**:815–817. doi:10.1212/WNL.0B013E3181F07E26
- 876 Wang WY, Pan L, Su SC, Quinn EJ, Sasaki M, Jimenez JC, MacKenzie IRA, Huang EJ, Tsai LH. 2013. Interaction of  
877 FUS and HDAC1 regulates DNA damage response and repair in neurons. *Nat Neurosci* **16**:1383–1391.  
878 doi:10.1038/NN.3514
- 879 Willett R, Martina JA, Zewe JP, Wills R, Hammond GRV, Puertollano R. 2017. TFEB regulates lysosomal  
880 positioning by modulating TMEM55B expression and JIP4 recruitment to lysosomes. *Nat Commun* **8**:1–17.  
881 doi:10.1038/s41467-017-01871-z
- 882 Wolozin B, Ivanov P. 2019. Stress granules and neurodegeneration. *Nat Rev Neurosci* **20**:649–666.  
883 doi:10.1038/s41583-019-0222-5
- 884 Xia Q, Wang H, Hao Z, Fu C, Hu Q, Gao F, Ren H, Chen D, Han J, Ying Z, Wang G. 2016. TDP-43 loss of function  
885 increases TFEB activity and blocks autophagosome–lysosome fusion. *EMBO J* **35**:121–142.  
886 doi:10.15252/EMBJ.201591998
- 887 Yang L, Gal J, Chen J, Zhu H. 2014. Self-assembled FUS binds active chromatin and regulates gene transcription.  
888 *Proc Natl Acad Sci USA* **111**:17809–17814. doi:10.1073/PNAS.1414004111
- 889 Yang P, Mathieu C, Kolaitis RM, Zhang P, Messing J, Yurtsever U, Yang Z, Wu J, Li Y, Pan Q, Yu J, Martin EW,  
890 Mittag T, Kim HJ, Taylor JP. 2020. G3BP1 Is a Tunable Switch that Triggers Phase Separation to Assemble  
891 Stress Granules. *Cell* **181**:325–345.e28. doi:10.1016/J.CELL.2020.03.046
- 892 Young LJ, Ströhl F, Kaminski CF. 2016. A Guide to Structured Illumination TIRF Microscopy at High Speed with  
893 Multiple Colors. *J Vis Exp* **111**:e53988. doi:10.3791/53988
- 894 Zhang Xiaojie, Li L, Chen S, Yang D, Wang Y, Zhang Xin, Wang Z, Le W. 2011. Rapamycin treatment augments  
895 motor neuron degeneration in SOD1G93A mouse model of amyotrophic lateral sclerosis. *Autophagy*  
896 **7**:412–425. doi:10.4161/AUTO.7.4.14541

897

898
